# The cohesin subunit RAD21.2 functions as a recombination silencer of ribosomal DNA arrays

**One-Sentence Summary:** The cohesin component RAD21.2 represses meiotic recombination and by that contributes to genome stability over generations.

## Authors

Viola Kuttig<sup>1,\$</sup>, Jason Sims<sup>1,2,6,\$</sup>, Yuki Hamamura<sup>1</sup>, Shinichiro Komaki<sup>3</sup>, Maren Köhler<sup>1</sup>, Sara Christina Stolze<sup>4</sup>, Joke De Jaeger-Braet<sup>1</sup>, Hasibe Tuncay Elbasy<sup>1</sup>, Hirofumi Nakagami<sup>4</sup>, Antonio Virgilio Failla<sup>5</sup>, Peter Schlögelhofer<sup>2</sup>, and Arp Schnittger<sup>1,\*</sup>

## Affiliations

<sup>1</sup> University of Hamburg, Department of Developmental Biology, Ohnhorststr. 18, D-22609 Hamburg, Germany.

<sup>2</sup> Department of Chromosome Biology, Max Perutz Labs, Vienna Biocenter, University of Vienna, Vienna, Austria.

<sup>3</sup> Nara Institute of Science and Technology, Graduate School of Biological Sciences, 8916-5 Takayama, Ikoma, Nara 630-0192, Japan.

<sup>4</sup> Max-Planck-Institute for Plant Breeding Research, 50829 Cologne, Germany.

<sup>5</sup> Light microscopy facility, University medical center Hamburg Eppendorf, Martini Straße 52, 22046 Hamburg

<sup>6</sup> Current address: St. Anna Children's Cancer Research Institute (CCRI), Vienna Austria.

\$ equal contribution

\* For correspondence: arp.schnittger@uni-hamburg.de, Phone: +49 40 428 16 502, Fax: +49 40 428 16 503

## 28 **Introductory Paragraph**

29 **In many species, including Arabidopsis, heterochromatin often comprises repetitive DNA**  
30 **elements, such as arrays of ribosomal DNA (rDNA). Repetitive regions pose a risk in meiosis**  
31 **since recombination between them can lead to gross genomic rearrangements. However,**  
32 **meiotic recombination at rDNA arrays and other heterochromatic repeat regions is blocked**  
33 **by not well understood mechanisms. Here, we have identified RAD21.2, an  $\alpha$ -kleisin subunit**  
34 **of cohesin, as a repressor of meiotic recombination at the rDNA regions in Arabidopsis. We**  
35 **show that RAD21.2 co-localizes with heterochromatic factors and is specifically enriched at**  
36 **rDNA repeats, which are devoid of the meiosis specific  $\alpha$ -kleisin REC8, needed for**  
37 **recombination. Knocking down RAD21.2, we find that REC8 moves into the nucleolus**  
38 **organizing regions (NORs), where we see an increase of RAD51 recombinase foci numbers.**  
39 **Concomitantly, we find extensive rearrangements of the NORs and the offspring of these**  
40 **plants have large variation in rDNA copy numbers demonstrating that RAD21.2 is necessary**  
41 **for transgenerational genome stability.**

42

## 43 **Main Text**

44 According to a broadly accepted model, cohesin complexes embrace the two sister chromatids of  
45 each replicated chromosome with their ring-like structure<sup>1</sup>. Cohesins are essential for two central  
46 aspects of meiosis<sup>1</sup> : First, they mediate the ordered segregation of homologous chromosomes  
47 (homologs) in meiosis I and sister chromatids in meiosis II to yield balanced gametes with half of  
48 the DNA content of the meiotic mother cell. Second, cohesins are an integral part of the meiotic  
49 chromosome axis and are therefore crucial for meiotic recombination and genetic diversity of the  
50 offspring.

51 The core cohesin complex is composed of four subunits: SMC1 and SMC3, two ATPases  
52 that belong to the family of structural maintenance of chromosomes (SMC) proteins, the HEAT-  
53 repeat domain protein SCC3/SA and an  $\alpha$ -kleisin component<sup>1</sup>. To accommodate meiosis-specific  
54 functions, the mitotic  $\alpha$ -kleisin RAD21 is usually replaced by REC8 in meiosis<sup>2-4</sup>. Yet, REC8 is  
55 not the only meiosis-specific  $\alpha$ -kleisin and additional  $\alpha$ -kleisins have been identified to be relevant  
56 for meiosis in *C. elegans* and mammals<sup>5-9</sup>. Up to now, these  $\alpha$ -kleisin components have been found  
57 to work together with and/or take over specific functions of REC8 in mediating cohesion and

58 recombination. However, additional  $\alpha$ -kleisin components are prevalent in other eukaryotes and  
59 their role is not very well understood.

60 In addition to REC8 (also called SYN1 or DIF1), the model plant *Arabidopsis thaliana*  
61 encodes three predicted  $\alpha$ -kleisins named RAD21.1 (SYN2), RAD21.2 (SYN3), and RAD21.3  
62 (SYN4). Currently, the specific function of these three *RAD21* genes is poorly understood.  
63 *RAD21.1* and *RAD21.3* have been implicated in the DNA damage response. However, no severe  
64 mutant phenotype could be detected for single and double mutants<sup>10</sup>. In contrast, *RAD21.2* is an  
65 essential gene and homozygous mutants could not be recovered<sup>10,11</sup>. Heterozygous mutants in  
66 *RAD21.2* show fertility defects and the protein seems to be required for both pollen and embryo  
67 sac development. In addition, both RNAi-mediated silencing of *RAD21.2* and overexpressing a C-  
68 terminally tagged RAD21.2 resulted in early meiotic defects, which include loss of synapsis and  
69 reduced loading of the transverse element ZYP1<sup>12,13</sup>. Using an antibody, RAD21.2 was reported  
70 to localize to the nucleolus of meiocytes. Together with the additionally observed changes in  
71 protein accumulation patterns, these findings question whether RAD21.2 acts as a *bona fide*  
72 cohesin component<sup>12</sup>.

73 To determine the expression pattern of RAD21.1 and RAD21.3 and to revisit the  
74 accumulation of RAD21.2 in meiosis, we generated genomic reporter constructs in which GFP  
75 was inserted at the C-termini. To facilitate a co-localization analysis with REC8, we exchanged  
76 GFP with RFP in a previously published functional reporter for REC8 (*PRO<sub>REC8</sub>:REC8:GFP*)<sup>14</sup>.  
77 We found that all three RAD21 genes are expressed in somatic tissues where REC8, as expected,  
78 is absent (Fig. S1AI-II and BI-II, Fig. S2AI-II and Movie S1). In addition, all three RAD21  
79 proteins accumulate in the progenitor cells of meiocytes and in the tissue surrounding the  
80 meiocytes (Fig. S1AIII, BIII and Fig. S2B). RAD21.1:GFP and RAD21.3:GFP were not detected  
81 in meiocytes, where instead REC8 is expressed (Fig. S1AIII and BIII). In contrast, RAD21.2:GFP  
82 is present in meiosis I and decorates meiotic chromosomes (Fig. S2B). A similar chromosomal  
83 localization pattern was also found for an N-terminal fusion to RAD21.2, i.e.  
84 *PRO<sub>RAD21.2</sub>:GFP:RAD21.2* (Fig. S2B). Importantly, the N-terminally tagged protein fully  
85 complements the growth and fertility defects observed in *rad21.2* mutants (Fig. S3A). The  
86 localization of RAD21.2 is consistent with its potential function as a cohesin subunit<sup>12</sup>.

87 To address whether RAD21.2 could act as a cohesin subunit, we first revealed that it was  
88 binding in yeast two-hybrid assays to the core cohesin components SMC1 and SCC3 (Fig. S3B).  
89 Next, we tested whether this interaction can also be found *in vivo*. To this end, we

90 immunoprecipitated GFP-fused RAD21.2 from transgenic seedlings and determined proteins  
91 interacting *in vivo* by mass spectrometry analysis. As a control, we used plants expressing unfused  
92 GFP. SMC1 and SMC3 were identified as the top 2 significantly enriched proteins pulled down  
93 with RAD21.2 (Fig. S4A, Table S1, SMC1:  $p=0.003$ , SMC3:  $p=0.001$ ). Thus, we conclude that  
94 RAD21.2 is part of a cohesin complex *in vivo*.

95 Next, we aimed at a detailed localization analysis of RAD21.2 throughout meiosis.  
96 However, the fluorescent signals of RAD21.2:GFP and GFP:RAD21.2 are not sufficiently intense  
97 when expressed under the control of the endogenous *RAD21.2* promoter to conduct live cell  
98 imaging experiments. Therefore, we generated a further *RAD21.2* reporter construct using the  
99 *ASK1* promoter to drive *GFP:RAD21.2* (*PRO<sub>ASK1</sub>:GFP:RAD21.2*). The construct could fully  
100 complement the deficiencies of homozygous *rad21.2* mutant lines (Fig. S3A). Importantly, the  
101 localization pattern of the GFP:RAD21.2 fusion protein expressed from the *ASK1* promoter could  
102 readily be assessed and showed qualitatively the same chromosome association as GFP:RAD21.2  
103 expressed from its endogenous promoter (Fig. 1A, Movies S2 and S3). For reasons of simplicity  
104 the *PRO<sub>ASK1</sub>:GFP:RAD21.2* plant line is termed a*GFP:RAD21.2* below.

105 We combined the a*GFP:RAD21.2* line with our *REC8:RFP* reporter and found that  
106 RAD21.2, in contrast to the even distribution of REC8 along chromosomes, largely accumulates  
107 on chromosomes at the border of the nucleolus from leptotene through zygotene until early  
108 pachytene (see arrowhead Fig. 1B). A similar localization, albeit much weaker, is also seen for the  
109 *PRO<sub>RAD21.2</sub>:RAD21.2:GFP* (Fig. S2B). Towards late pachytene, the cluster of RAD21.2 cannot be  
110 detected and becomes more diffusely distributed in the nucleus. These results are consistent with  
111 the notion that the regions enriched in RAD21.2 are associated with the nucleolus, where REC8 is  
112 not present (Fig. 1B). The nucleolus association was further supported by analyzing a reporter line  
113 containing a*GFP:RAD21.2* together with a C-terminally TFP-tagged *FIBRILLARIN 2* gene (*FIB2*)  
114 expressed under its endogenous promoter as a nucleolus marker (*PRO<sub>FIB2</sub>:FIB2:TFP*)<sup>15</sup> (Fig. 1D  
115 and S4B).

116 During metaphase I, the local fluorescence intensity of a*GFP:RAD21.2* increases likely  
117 due to the condensation of the chromosomes (Fig. 1B, C and Movie S3). At the onset of anaphase  
118 I, the a*GFP:RAD21.2* signal completely disappears consistent with the cleavage of RAD21.2 by  
119 separase. We never observed re-appearance of a*GFP:RAD21.2* fluorescence during meiosis after  
120 anaphase I. However, a*GFP:RAD21.2* can be detected again once meiosis is completed in the  
121 developing microspores (Fig. S4C).

122 To confirm the localization of RAD21.2, we performed Lipsol spreads of wild-type  
123 meiocytes staining for RAD21.2 (newly generated antibody – this study) and for REC8. The results  
124 show a very similar localization pattern of RAD21.2 to the aGFP:RAD21 proving that  
125 aGFP:RAD21 is not only functional but shows an accumulation pattern similar to that of the  
126 endogenous RAD21.2. Furthermore, we also performed super-resolution stimulated emission  
127 depletion (STED) microscopy of RAD21.2 and REC8 revealing the structure of the RAD21.2  
128 cluster which is located at regions completely depleted from REC8. This further supports our  
129 findings that the region to which RAD21.2 is binding localizes to the NORs (Fig. S4D).

130 Next, we asked whether the correct localization of RAD21.2 would be dependent on the  
131 removal of REC8 from the nucleolus-associated regions. REC8 in Arabidopsis is subject to the  
132 prophase pathway of cohesin removal mediated by the AAA+ ATPase WAPL<sup>18,19</sup>. We tested the  
133 localization of RAD21.2 in the absence of REC8 removal. However, we did not see any alteration  
134 of the aGFP:RAD21.2 signal intensity and distribution in *wapl1 wapl2* mutants indicating that the  
135 localization of RAD21.2 does not depend on the removal of REC8 and that RAD21.2 itself, in  
136 contrast to REC8, is not subject to the prophase cohesin removal pathway (Movie S4 and Fig.  
137 S5A). Conversely, we did not find any obvious differences in the distribution of aGFP:RAD21.2  
138 when expressed in *rec8* mutants (which remained not fertile, Fig. S5B-C) compared to the wildtype  
139 (Fig. S5D).

140 Since the NOR regions associated with the border of the nucleolus are comprised of  
141 heterochromatin, we next tested to what extent RAD21.2 is co-localizing with GC methylation as  
142 a hallmark of heterochromatin (visualized by *PRO<sub>HTR5</sub>:MBD6:RFP*)<sup>16</sup>, and with the histone variant  
143 H2A.W, which is specifically incorporated in heterochromatic domains  
144 (*PRO<sub>H2A.W.6</sub>:H2A.W.6:RFP*)<sup>17</sup>. Our results show that both heterochromatin markers strongly  
145 overlap with RAD21.2 (Fig. 1CD- E). Analyzing RAD21.2 together with H2A.W.6 in somatic  
146 cells (Fig. S2B) also shows a strong co-appearance of RAD21.2 and heterochromatic domains.  
147 This hypothesis was further corroborated by the observation that RAD21.2 strongly overlapped  
148 with late replicating DNA regions known to represent heterochromatin<sup>20</sup>, as visualized by the co-  
149 localization of RAD21.2 with large speckles of PCNA:RFP formed in late S-phase (Fig. S2D).  
150 Taken together, we conclude that the loading of RAD21.2 in meiocytes correlates with a  
151 heterochromatin environment.

152 To explore if RAD21.2 loading depends on a heterochromatic environment, we analyzed  
153 the localization of RAD21.2 in plants mutant for the gene *DEFICIENT IN DNA METHYLATION*

154 *I* (*DDMI*), which encodes a chromatin-remodeling protein that is required for the maintenance of  
155 heterochromatin<sup>21</sup> and genome stability<sup>22</sup>. Recently, it has been reported that DDM1 binds to  
156 H2A.W and mediates its deposition to heterochromatin<sup>23</sup>. However, an obvious change of the  
157 localization of RAD21.2 in *ddm1* mutants was not observed (Fig. S6A). Next, we analyzed the  
158 localization of RAD21.2 in *nucleolin 2* (*nuc2*) mutants since the large RAD21.2 cluster is  
159 nucleolus-associated. NUC2 is required for chromatin organization of silent 45S rDNA, and its  
160 loss leads to major changes in trans-generational stability of the 45S rDNA<sup>24</sup>. No obvious changes  
161 could be detected in the localization of RAD21.2 when compared to wild type (Fig. S6A). In  
162 contrast, the RAD21.2 signal was reduced in mutants of the *FASCIATA 1* (*FASI*) gene from pre-  
163 meiosis throughout prophase I (Fig. 1F). *FASI* encodes for a subunit of the CHROMATIN  
164 ASSEMBLY FACTOR (CAF) which is required for nucleosome assembly and maintenance of  
165 heterochromatin particularly the 45S rDNA repeats<sup>25,26</sup>. Notably, we never saw the typical  
166 RAD21.2 accumulation close to the nucleolus at zygotene/early pachytene (Fig. S6A, arrowhead).  
167 This could also reflect the lower copy number of the 45S rDNA repeat present in *fas1* mutants<sup>25,26</sup>.  
168 Thus, proper accumulation of RAD21.2 appears to depend on the correct nucleosome assembly in  
169 heterochromatic regions and on a wild-type copy number of the rDNA repeats.

170 Since the aGFP:RAD21.2 shows a clustered localization in the premises of the nucleolus,  
171 we investigated whether RAD21.2 would co-localize with the 45S rDNA region. To this end, we  
172 performed an Immuno-FISH experiment on Lipsol spreads of PMCs targeting RAD21.2, ASY1  
173 and the 45S rDNA. The results showed that the RAD21.2 cluster colocalizes with the 45S rDNA  
174 indicating that there is an overabundance of this specific cohesion subtype at the rDNA region  
175 (Fig. S6B). Furthermore, RAD21.2 overlaps with only a part of the 45S rDNA reinforcing the idea  
176 that it is associated with the heterochromatic regions of the NORs.

177 To probe the functional relevance of the RAD21.2 occupation at the nucleolar associated  
178 domains, we next generated an RNAi construct against *RAD21.2* since loss of RAD21.2 results in  
179 gametophytic lethality<sup>11</sup>, precluding an easy assessment of the consequences of altered RAD21.2  
180 abundance in meiosis. We recovered two independent transgenic lines with 25-35 percent lower  
181 *RAD21.2* expression levels that exhibit no obvious vegetative growth defects (Fig. S7A, B) but  
182 showed a reduction in silique length (Fig. S7C). The knock-down lines revealed a reduction of  
183 about 30% in pollen viability and a seed abortion level of around 45% (Fig. S7D, E). To address  
184 whether the defect does arise from chromosomal translocations generated by the insertion of the  
185 RNAi construct, we crossed the RAD21.2 RNAi #1 with the wildtype and performed spreads on

186 pollen mother cells. We could not detect any univalents or mispaired chromosomes. These results,  
187 together with the similarity between the two independent RNAi lines confirm that the effects we  
188 detect are genuinely due to the knock-down of *RAD21.2* (Fig. S7F).

189 To assess whether the reduced fertility in the *RAD21.2* RNAi lines is due to defects  
190 occurring during meiosis, we performed spreads on pollen mother cells (PMCs) (Fig. 2A and S8A).  
191 In wild-type plants, 5 separated bivalents are visible at diakinesis and metaphase I. In contrast,  
192 *RAD21.2 RNAi* plants show severe chromosomal defects. Entanglements and connections between  
193 non-homologous chromosomes could be observed. During metaphase I, most cells of wild-type  
194 plants formed five distinct bivalents (cells with chromosomes entanglements: 15%; n=130),  
195 whereas *RAD21.2 RNAi* plants showed at least two connected chromosome pairs per cell with a  
196 stretched morphology at a high frequency (cells with chromosomes entanglements: 72%; n=130)  
197 (Fig. 2B). We also observed defects in the second meiotic division with 7% of the meiocytes in  
198 the *RAD21.2 RNAi* plants showing unbalanced chromosome numbers at metaphase II (n=28) (Fig.  
199 2A), while no incident of unbalanced chromosomes was found in the wild-type (n=24).

200 To address the nature of the chromosomal abnormalities at metaphase I, we performed  
201 fluorescence *in situ* hybridization (FISH) (Fig. 2C). We identified connections between non-  
202 homologous chromosomes, for instance between chromosomes 3, 4 and 5 (Fig. 2C) and between  
203 chromosomes 3 and 4 (Fig. S8CI/II). We also revealed more complex chromosomal  
204 rearrangements such as the two homologous chromosomes 4 connected to other non-homologous  
205 chromosomes (Fig. 2CI) and a genome rearrangement event involving the 45S rDNA region,  
206 which is translocated from chromosome 4 to chromosome 3 (Fig. 2CII). In addition, we observed  
207 fragments of the 45S rDNA after meiosis I (Fig. S8BIII, arrowhead). Furthermore, we identified  
208 connections between the centromeres of chromosomes 2 and 3, suggesting a general increase in  
209 genome instability involving repetitive DNA regions (Fig. S8CII).

210 Several of the above-described chromosomal rearrangements could be explained by  
211 recombination events between the rDNA regions in the absence of *RAD21.2*. To investigate this,  
212 we examined the localization of the recombinase *RAD51* at the 45S rDNA region in  
213 leptotene/zygotene stages by immuno-FISH (Fig. 2D, E). While the total number of *RAD51* foci  
214 in wild-type ( $123 \pm 27$ , n=23) and in *RAD21.2 RNAi* plants ( $114 \pm 18$ , n=31) are similar, the number  
215 of *RAD51* foci at the 45S rDNA region increases from  $1.4 \pm 1$  foci in wild-type to  $2.7 \pm 1.5$   
216 ( $p=0.0049$ ) foci in the *RAD21.2 RNAi* meiocytes (Fig. 2F, G). This result supports the idea that  
217 *RAD21.2* is needed to suppress meiotic recombination at the rDNA loci, especially given that the

218 RAD21.2 RNAi plants, which could be recovered, only represent a moderate knock-down of  
219 RAD21.2.

220 As shown above and demonstrated in a previous study<sup>27</sup>, the meiotic  $\alpha$ -kleisin REC8,  
221 which is key for meiotic recombination as a part of the chromosome axis, is mostly excluded from  
222 the 45S rDNA region. To determine the localization of REC8 in this region in the *RAD21.2 RNAi*  
223 meiocytes, we performed immuno-FISH using fixed meiocytes (Fig. 3A, B). Comparing the  
224 relative fluorescence intensity profile plots of REC8 at the 45S loci revealed an increase in  
225 abundance of REC8 signal at the 45S region in the *RAD21.2 RNAi* plants (n=15, p=0.032)  
226 compared to the wild-type (n=15) (Fig. 3C-E).

227 We reasoned that an increase in recombination in the rDNA region should also affect gene  
228 copy number through deletions and insertions. Indeed, the 18S rDNA gene copy number varied  
229 significantly more in the offspring of the *RAD21.2 RNAi* plant compared to the progeny of three  
230 different wild-type plants (Fisher's F test, WT-1/*RNAi* p=0.018, WT-2/*RNAi* p=0.049 and WT-  
231 3/*RNAi* p=0.0045; Fig. 2H). To assess whether the 18S gene copy number variability is due to the  
232 rearrangements occurring in meiosis and not due to somatically occurring defects, we analyzed the  
233 18S rDNA copy number in leaves of different sizes in fully grown plants. The results showed no  
234 difference in the 18S copy number indicating that the variations detected in the progeny of the  
235 RAD21.2 RNAi plants arises from meiotic defects and not somatically (Fig. S8D).

236

237 Taken together, we have revealed a novel function in meiosis for the so far poorly characterized  
238  $\alpha$ -kleisin component RAD21.2. RAD21.2 is specifically loaded on the heterochromatic domain of  
239 the rDNA and possibly other heterochromatic regions, where it prevents loading of REC8 and  
240 suppresses aberrant recombination events. The role of RAD21.2 as a REC8 repellent stands in  
241 striking contrast to the so far described functions of other meiotic  $\alpha$ -kleisin components in other  
242 organisms, which co-operate with and/or substitute REC8 function<sup>5-9</sup>. It will now be interesting to  
243 analyze across different organisms to what degree other meiotic  $\alpha$ -kleisins may function as anti-  
244 recombination factors in maintaining genome stability.

245

## 246 **References**

- 247 1. Nasmyth, K. & Haering, C. H. Cohesin: its roles and mechanisms. *Annu Rev Genet* **43**,  
248 525-558 (2009).



249

- 250 2. Klein, F. et al. A central role for cohesins in sister chromatid cohesion, formation of axial  
251 elements, and recombination during yeast meiosis. *Cell* **98**, 91-103 (1999).
- 252
- 253 3. Watanabe, Y. & Nurse, P. Cohesin Rec8 is required for reductional chromosome  
254 segregation at meiosis. *Nature* **400**, 461-464 (1999).
- 255
- 256 4. Bhatt, A. M. et al. The DIF1 gene of Arabidopsis is required for meiotic chromosome  
257 segregation and belongs to the REC8/RAD21 cohesin gene family. *The Plant Journal* **19**,  
258 463-472 (1999).
- 259
- 260 5. Severson, A. F., Ling, L., van Zuylen, V. & Meyer, B. J. The axial element protein HTP-3  
261 promotes cohesin loading and meiotic axis assembly in *C. elegans* to implement the  
262 meiotic program of chromosome segregation. *Genes & development* **23**, 1763-1778 (2009).
- 263
- 264 6. Severson, A. F. & Meyer, B. J. Divergent kleisin subunits of cohesin specify mechanisms  
265 to tether and release meiotic chromosomes. *Elife* **3**, e03467 (2014).
- 266
- 267 7. Herrán, Y. et al. The cohesin subunit RAD21L functions in meiotic synapsis and exhibits  
268 sexual dimorphism in fertility. *The EMBO journal* **30**, 3091-3105 (2011).
- 269
- 270 8. Ishiguro, K., Kim, J., Fujiyama-Nakamura, S., Kato, S. & Watanabe, Y. A new meiosis-  
271 specific cohesin complex implicated in the cohesin code for homologous pairing. *EMBO*  
272 *Rep* **12**, 267-275 (2011).
- 273
- 274 9. Lee, J. & Hirano, T. RAD21L, a novel cohesin subunit implicated in linking homologous  
275 chromosomes in mammalian meiosis. *J Cell Biol* **192**, 263-276 (2011).
- 276
- 277 10. da Costa-Nunes, J. A. et al. Characterization of the three Arabidopsis thaliana RAD21  
278 cohesins reveals differential responses to ionizing radiation. *J Exp Bot* **57**, 971-983 (2006).
- 279
- 280 11. Jiang, L., Xia, M., Strittmatter, L. I. & Makaroff, C. A. The Arabidopsis cohesin protein

- 281 SYN3 localizes to the nucleolus and is essential for gametogenesis. *The Plant Journal* **50**,  
282 1020-1034 (2007).  
283
- 284 12. Yuan, L., Yang, X., Ellis, J. L., Fisher, N. M. & Makaroff, C. A. The Arabidopsis SYN3  
285 cohesin protein is important for early meiotic events. *Plant J* **71**, 147-160 (2012).  
286
- 287 13. Yuan, L., Yang, X., Auman, D. & Makaroff, C. A. Expression of epitope-tagged SYN3  
288 cohesin proteins can disrupt meiosis in Arabidopsis. *J Genet Genomics* **41**, 153-164 (2014).  
289
- 290 14. Prusicki, M. A. et al. Live cell imaging of meiosis in Arabidopsis thaliana. *Elife* **8**, (2019).  
291
- 292 15. Pontvianne, F. et al. Identification of nucleolus-associated chromatin domains reveals a  
293 role for the nucleolus in 3D organization of the A. thaliana genome. *Cell reports* **16**, 1574-  
294 1587 (2016).  
295
- 296 16. Ingouff, M. et al. Live-cell analysis of DNA methylation during sexual reproduction in  
297 Arabidopsis reveals context and sex-specific dynamics controlled by noncanonical RdDM.  
298 *Genes Dev* **31**, 72-83 (2017).  
299
- 300 17. Yelagandula, R. et al. The histone variant H2A.W defines heterochromatin and promotes  
301 chromatin condensation in Arabidopsis. *Cell* **158**, 98-109 (2014).  
302
- 303 18. De, K., Sterle, L., Krueger, L., Yang, X. & Makaroff, C. A. Arabidopsis thaliana WAPL is  
304 essential for the prophase removal of cohesin during meiosis. *PLoS Genet* **10**, e1004497  
305 (2014).  
306
- 307 19. Yang, C. et al. SWITCH 1/DYAD is a WINGS APART-LIKE antagonist that maintains  
308 sister chromatid cohesion in meiosis. *Nat Commun* **10**, 1755 (2019).  
309
- 310 20. Concia, L. et al. "Genome-wide analysis of the Arabidopsis replication timing  
311 program." *Plant physiology* **176.3** (2018).  
312

- 313 21. Soppe, Wim JJ, et al. DNA methylation controls histone H3 lysine 9 methylation and  
314 heterochromatin assembly in Arabidopsis. *The EMBO journal* **21.23**, 6549-6559(2002).  
315
- 316 22. Hirochika, Hirohiko, Hiroyuki Okamoto, and Tetsuji Kakutani. Silencing of  
317 retrotransposons in Arabidopsis and reactivation by the *ddm1* mutation. *The Plant*  
318 *Cell* **12.3**, 357-368 (2000).  
319
- 320 23. Osakabe, Akihisa, et al. The chromatin remodeler DDM1 prevents transposon mobility  
321 through deposition of histone variant H2A. *W. Nature Cell Biology* **23.4**, 391-400 (2021).  
322
- 323 24. Durut, Nathalie, et al. A duplicated NUCLEOLIN gene with antagonistic activity is  
324 required for chromatin organization of silent 45S rDNA in Arabidopsis. *The Plant*  
325 *Cell* **26.3**, 1330-1344 (2014).  
326
- 327 25. Mozgová, Iva, Petr Mokroš, and Jiří Fajkus. Dysfunction of chromatin assembly factor 1  
328 induces shortening of telomeres and loss of 45S rDNA in Arabidopsis thaliana. *The Plant*  
329 *Cell* **22.8**, 2768-2780 (2010).  
330
- 331 26. Muchová, Veronika, et al. Homology-dependent repair is involved in 45 S rDNA loss in  
332 plant CAF-1 mutants. *The Plant Journal* **81.2**, 198-209 (2015).  
333
- 334 27. Sims, J., Copenhaver, G. P. & Schlögelhofer, P. Meiotic DNA Repair in the Nucleolus  
335 Employs a Nonhomologous End-Joining Mechanism. *Plant Cell* **31**, 2259-2275 (2019).  
336
- 337 28. Wellmer, F., Alves-Ferreira, M., Dubois, A., Riechmann, J. L. & Meyerowitz, E. M.  
338 Genome-wide analysis of gene expression during early Arabidopsis flower development.  
339 *PLoS Genet* **2**, e117 (2006).  
340
- 341 29. Komaki, S. & Schnittger, A. The Spindle Assembly Checkpoint in Arabidopsis Is Rapidly  
342 Shut Off during Severe Stress. *Dev Cell* **43**, 172-185.e5 (2017).  
343
- 344 30. Ross, K. J., Fransz, P. & Jones, G. H. A light microscopic atlas of meiosis in Arabidopsis

345 thaliana. *Chromosome Res* **4**, 507-516 (1996).

346

347 31. Schindelin, J. et al. Fiji: an open-source platform for biological-image analysis. *Nat*  
348 *Methods* **9**, 676-682 (2012).

349

350 32. Rappsilber, J., Ishihama, Y. & Mann, M. Stop and go extraction tips for matrix-assisted  
351 laser desorption/ionization, nanoelectrospray, and LC/MS sample pretreatment in  
352 proteomics. *Analytical chemistry* **75**, 663-670 (2003).

353

354 33. Cox, J. & Mann, M. MaxQuant enables high peptide identification rates, individualized  
355 p.p.b.-range mass accuracies and proteome-wide protein quantification. *Nat Biotechnol* **26**,  
356 1367-1372 (2008).

357

358 34. Tyanova, S., Temu, T. & Cox, J. The MaxQuant computational platform for mass  
359 spectrometry-based shotgun proteomics. *Nat Protoc* **11**, 2301-2319 (2016).

360

361

## 362 **Acknowledgments**

363 We thank Eva R. Hoffmann (University of Copenhagen), Kostas Lampou (University of  
364 Hamburg), Lucas Lang (University of Hamburg), and Maren Heese (University of Hamburg) for  
365 critical reading and helpful comments to the manuscript. We thank Anne Harzen for support in the  
366 mass-spectrometry experiments. We are grateful to the Max-Planck-Gesellschaft (HN) and  
367 University of Hamburg (AS) for core funding. This work was supported through an Austrian  
368 Science Fund grant (# I 3685-B25) to P.S. and a DFG grant (SCHN 736/8-1) to A.S.

369

## 370 **Competing interests**

## 371 **Data and materials availability**

372

## 372 **Figs. 1 to 3**

373 **Fig. 1. Meiotic localization pattern of RAD21.2:** A, Confocal laser scanning micrographs of  
374 Arabidopsis anthers expressing PRO<sub>REC8</sub>:REC8:RFP (magenta) together with

375 *PRO<sub>ASK1</sub>:GFP:RAD21.2* (green). Upper row, RAD21.2 but not REC8 is present in all cells prior  
376 to meiosis (close-up highlighted in box). Note the thread like structure decorated by RAD21.2  
377 reaching into the nucleolus (arrowhead), see text for details. Lower row, next to REC8, only  
378 RAD21.2 out of the three RAD21 proteins accumulates in meiosis (here pachytene stage) and  
379 decorates chromosomes. Scale bar: 20  $\mu\text{m}$ . **B**, Confocal laser scanning micrographs of male  
380 meiocytes revealing distinct and largely not overlapping localization patterns of  
381 *PRO<sub>ASK1</sub>:GFP:RAD21.2* (green) and *PRO<sub>REC8</sub>:REC8:RFP* (magenta). Notably, RAD21.2 is  
382 enriched at nucleolar chromatin (arrowhead) in early prophase I. Scale bar: 1  $\mu\text{m}$ . **C**, Confocal  
383 laser scanning micrographs of male meiocytes showing that *PRO<sub>H2A.W.6</sub>:H2A.W.6:RFP* (magenta)  
384 largely co-localizes with a sub-fraction of the *PRO<sub>ASK1</sub>:GFP:RAD21.2*-marked chromatin (green),  
385 for instance in the perinucleolar region (arrowheads). Scale bar: 1  $\mu\text{m}$ . **D**, Confocal laser scanning  
386 micrographs of meiocytes expressing the nucleolus reporter *PRO<sub>FIB2</sub>:FIB2:mTurquoise* (cyan),  
387 *PRO<sub>ASK1</sub>:GFP:RAD21.2* (green) and *PRO<sub>HTR5</sub>:MBD6:RFP* (magenta) showing highly methylated  
388 DNA regions, which are decorated by RAD21.2, clustered in the proximity of the nucleolus at  
389 early pachytene (upper row) and a distributed pattern during the dissolution of the nucleolus in late  
390 pachytene (lower row). Scale bar: 1  $\mu\text{m}$ . **E**, Quantification of the overlap between H2A.W.6 and  
391 RAD21.2 accumulation patterns seen in **C**. Upper row: Yellow lines indicate a region in the  
392 perinuclear region (solid line) and a region distant from the nucleolus (dashed line) used for  
393 quantification. Lower row: Profile plot of the relative fluorescence intensities of RAD21.2 (green  
394 lines) and H2A.W (magenta lines) in the nucleolar area (solid lines) and outside of the nucleolus  
395 (dashed lines). The fluorescence intensities were normalized to the highest fluorescent value. Scale  
396 bar: 1  $\mu\text{m}$ . **F**, Confocal laser scanning micrograph of an anther expressing *PRO<sub>ASK1</sub>:GFP:RAD21.2*  
397 in *fas1*<sup>+/-</sup> mutants show the typical chromosomal localization pattern of GFP:RAD21.2 (green)  
398 from pre-meiosis to pachytene. A compromised localization in *fas1* mutants was observed starting  
399 from zygotene onwards. Scale bar: 5  $\mu\text{m}$ .

400

401 **Fig. 2. Knocking down of *RAD21.2* results in recombination defects:** **A**, Chromosome spread  
402 analysis of pollen mother cells in wild-type (upper row) in comparison to *RAD21.2 RNAi* plants  
403 (lower row), which often have chromosome entanglements seen in diakinesis and metaphase I  
404 (arrowhead). Scale bar: 10  $\mu\text{m}$ . **B**, Graph depicting the percentage of cells with (dark grey) and  
405 without (light grey) chromosome entanglements in metaphase I of the wild-type (15%; n=130) and  
406 *RAD21.2 RNAi* (72%; n=130; p-value=8.23E-27, Student's *t*-test). **C**, FISH analysis of metaphase

407 I cells of pollen mother cells from the wild-type and *RAD21.2 RNAi* plants. Probes against 45S  
408 rDNA (cyan), 5S rDNA (red) and CEN (green) loci were used to identify chromosomes; DNA was  
409 visualized by DAPI (grey). See text for details. Scale bar: 10  $\mu$ m **D**, Immuno-FISH analysis of  
410 wild-type and *RAD21.2 RNAi* pollen mother cells at zygotene. The axis has been stained with anti-  
411 ASY1 (cyan) for staging and the DNA repair sites are highlighted by anti-RAD51 (magenta). The  
412 45S rDNA has been visualized with a specific FISH probe (white). Scale bar: 5  $\mu$ m. **E**, Related to  
413 **D**, RAD51 foci were counted in the NOR region, marked by the orange line. **F**, The total number  
414 of RAD51 foci at leptotene/zygotene stage in wild-type versus *RAD21.2 RNAi* plants is not  
415 significantly different. **G**, The number of RAD51 foci counted on the 45S region at  
416 leptotene/zygotene is significantly larger in *RAD21.2 RNAi* plants than in the wild-type. **H**, Box  
417 plot depicting the 18S gene copy number in the offspring of 3 wild-type plants (Wildtype 1: n=23,  
418 Wildtype 2: n=48, Wildtype 3: n=16) compared to the offspring of a *RAD21.2 RNAi* plant (n=78),  
419 which has a significant higher variance of the 18S copy number than the wild-type.

420

421 **Fig. 3. REC8 accumulates in the 45S rDNA region of meiocytes in *RAD21.2 RNAi* plants: A**,  
422 Immuno-FISH analysis of wild-type and *RAD21.2 RNAi* pollen mother cells at pachytene. The  
423 axis has been stained with anti-ASY1 (cyan) and the meiosis-specific cohesin subunit with anti-  
424 REC8 (magenta). The 45S rDNA has been visualized with a specific FISH probe (white). The  
425 yellow lines define regions used to quantify the fluorescence intensities. Scale bar: 1  $\mu$ m. **B**,  
426 Related to **A**, magnification of the 45S rDNA region for the wild-type and *RAD21.2 RNAi* plants  
427 with REC8 (magenta) and 45S (light grey). An increased REC8 localization to the 45S rDNA in  
428 *RAD21.2 RNAi* plants in comparison to the wild-type can be observed. **C** and **D**, Profile plots of  
429 the fluorescence intensities of REC8 (magenta) and 45S rDNA (light grey) for the wild-type (**C**)  
430 and *RAD21.2 RNAi* plants (**D**). The fluorescence intensity was normalized to the highest  
431 fluorescent value. **E**, The average relative fluorescence intensity of the REC8 signal taken at the  
432 maxima of the 45S rDNA is significantly higher in *RAD21.2 RNAi* plants (n=15) than in the wild-  
433 type (n=15) (p-value=0.032).

434

## 435 **Materials and Methods**

436

### 437 **Plant material**

438 In this study, the *Arabidopsis thaliana* accession Columbia (Col-0) was used as the wild-type  
439 reference. The used T-DNA insertion lines SALK\_044851 (*rad21.1*), SALK\_053140 (*rad21.2*),  
440 SALK\_076116 (*rad21.3*), SAIL\_807\_B08 (*rec8*), SALK\_076791 (*wapl1-1*), SALK\_127445  
441 (*wapl2*), GK\_178D01 (*nuc2-2*), *ddm1-2* and SAIL\_662\_D10 (*fas1*) were obtained from the  
442 Nottingham Arabidopsis Stock Center (<http://arabidopsis.info/>). The *35S:API-GR ap1 cal* line  
443 was kindly provided by Frank Wellmer<sup>28</sup>. Genotypes were determined by PCR using primers listed  
444 in Supplementary Table S2. *PRO<sub>REC8</sub>:REC8:GFP<sup>14</sup>* (14), *PRO<sub>H2A.W.6</sub>:H2A.W.6:RFP<sup>17</sup>* ,  
445 *PRO<sub>HTR5</sub>:MBD6:GFP<sup>16</sup>* and *PRO<sub>RPS5</sub>:RFP:TUA5<sup>29</sup>* reporters were previously generated.

446

### 447 **Plant growth conditions**

448 Seeds were surface-sterilized with chlorine gas and sown on 1% (w/v) agar plates containing half-  
449 strength Murashige and Skoog (MS) salts, 1% sucrose, pH 5.8. Antibiotics were added for seed  
450 selection when required. For stratification, plates were stored 2 days at 4°C in the dark, thereafter  
451 plates were transferred for 10 days to a growth chamber with long day conditions (16h of light;  
452 21°C/ 8h of dark; 18°C and 60% humidity) for seed germination. Seedlings were transferred to  
453 soil and grown under long day conditions until seed production.

454

### 455 **Plasmid constructions and plant transformation**

456 To create the *PRO<sub>RAD21s</sub>:RAD21s:GFP* and *PRO<sub>RAD21.2</sub>:GFP:RAD21.2* constructs, a fragment  
457 covering the genomic region of each gene together with an upstream region of the start codon of  
458 2 Kb, 1 Kb and 2.5 Kb, respectively, along with 1 Kb downstream of the stop codon of each gene  
459 was amplified by PCR and cloned into pENTR2B by SLiCE. A restriction enzyme site (*Sma*I for  
460 *RAD21.1* and *RAD21.2*, and *Nae*I for *RAD21.3*) was inserted in front of the stop codon (C-terminal  
461 GFP fusion) or behind the start codon (N-terminal GFP fusion) of the RAD21s constructs. The  
462 resulting construct was linearized by the restriction enzyme digestion and was ligated to the *GFP*  
463 gene, followed by LR recombination reactions with the destination vector *pGWB501*.

464 For the exchange of the native RAD21.2 promoter with the ASK1 promoter (1 kb upstream of the  
465 start codon), the promoter sequence was amplified by PCR and cloned into the *pENTR2B*  
466 *PRO<sub>RAD21.2</sub>:GFP:RAD21.2* by SLiCE, followed by LR recombination reaction with the destination  
467 vector *pGWB501*.

468 To generate the *PRO<sub>FIB2</sub>:FIB2:mTurquoise*, the genomic FIB2 sequence and 1kb upstream of the  
469 start codon and 800 bp downstream of the stop codon was amplified by PCR and cloned into the

470 *pENTR2B* vector by SLiCE. A *SmaI* restriction enzyme site was inserted in front of the stop codon.  
471 The resulting construct was linearized by *SmaI* digestion and was ligated to the *mTurquoise* gene.  
472 To generate the *RAD21.2 RNAi* construct, a 400 bp fragment of the *RAD21.2* CDS was amplified  
473 by PCR with attB flanking primers and cloned into the *pDONR221* vector by gateway BP reaction.  
474 The resulting construct was integrated into the *pK7GWIWG2* vector by gateway LR reaction. All  
475 primers used for plasmid construction are listed in Supplementary Table S2.  
476 All constructs were transformed into *Arabidopsis thaliana* plants by floral dipping.

477

### 478 **Phenotypic evaluation**

479 Peterson staining was used to analyze the pollen viability (Peterson et al., 2010). Three flower  
480 buds containing either dehiscent or non-dehiscent (for whole anther staining) pollen were collected  
481 and dipped in 25  $\mu$ l Peterson staining solution (10% ethanol, 0.01% malachite green, 25% glycerol,  
482 0.05% acid fuchsin, 0.005% orange G, 4% glacial acetic acid) for 15 s on a microscope slide that  
483 was covered by a coverslip. Slides were incubated at 80°C for 10 min (for pollen counting) or 30  
484 min (for whole anther staining) and aborted and non-aborted pollen grains were observed using a  
485 light microscope. Seed sets were determined by quantifying viable and aborted seeds of mature  
486 siliques; 3 siliques per plant were analyzed.

487

### 488 **Cytogenetic analysis**

489 The preparation of pollen mother cells DAPI spreads was performed as previously described<sup>24</sup>.  
490 Flower buds were fixed in 3:1 ethanol/ acetic acid (fixative) over night and washed once with fresh  
491 fixative solution followed and stored in 70% ethanol at 4°C. The flower buds were staged by size  
492 and washed once with ddH<sub>2</sub>O and once with 10mM citrate buffer. The digestion of flower buds  
493 was performed in 10 mM citrate buffer (0.5% w/v cellulose, 0.5% w/v pectolyase and 0.5% w/v  
494 cytohelicase) for 2.5 hours at 37 °C. For the chromosome spreading, single flower buds were  
495 transferred to a drop of 45% acetic acid on a glass slide and squashed with a bended needle for 1  
496 min. The spreading was performed for 1 min on a 46°C hot plate. The slide was washed with  
497 fixative solution and dried for at least 2 hours. The chromosome spreads were stained by 18  $\mu$ l of  
498 Vectashield Antifade Mounting medium with DAPI (vector laboratories) and sealed with a cover  
499 slip.

500

### 501 **FISH**



502 The DAPI slides selected for fluorescence *in situ* hybridization (FISH) were washed in 100%  
503 ethanol until the coverslips could be easily removed (5-10 min) and subsequently washed in 4T  
504 (4X SCC and 0.05% v/v Tween20) for at least 1 h in order to remove the mounting medium.

505 After washing the slides in 2X SCC for 10 min they were placed in pre-warmed 0.01 M  
506 HCl with 250  $\mu$ l of 10 mg/ml Pepsin for 90 seconds at 37 °C. The slides were then washed in 2X  
507 SCC for 10 min at room temperature. 15  $\mu$ l of 4% paraformaldehyde (PFA) were added onto the  
508 slides, covered with a strip of autoclave bag and placed for 10 min in the dark at RT. The slides  
509 were then washed with deionized water for 1 minute and dehydrated by passing through an alcohol  
510 series of 70, 90, 100 %, for 2 minutes each. Slides were left to air-dry for 30 min.

511 Meanwhile, the probe mix was prepared by diluting 1  $\mu$ l of probe (2-3  $\mu$ g of DNA) in a total of 20  
512  $\mu$ l of hybridization mix (10% dextran sulphate MW 50,000, 50% formamide in 2x SSC).

513 Only 50 pmols (final concentration) of the LNA probes were used per slide. The probe mix was  
514 denatured at 95 °C for 10 min and then placed on ice for 5 min. Afterwards, the probe mix was  
515 added to the slide, covered with a glass coverslip, sealed and placed on a hot plate for 4 min in the  
516 dark at 75 °C. Finally, the slides were placed in a humidity chamber over-night at 37 °C. After  
517 hybridization, the coverslips were carefully removed and the slides were treated with 50%  
518 formamide in 2X SCC for 5 min in the dark at 42 °C. The slides were then washed twice with 2X  
519 SCC for 5 min in the dark at room temperature. Finally, 15  $\mu$ l of DAPI-Vectashield solution were  
520 added to the slide and sealed with a coverslip. Images were taken on a Zeiss Axioplan microscope  
521 (Carl Zeiss) equipped with a mono cool-view CCD camera. For all repetitive regions analyzed we  
522 used specific LNA probes see Table S2.

523

## 524 **RAD21.2 antibody generation**

525 Polyclonal antibodies against peptides CET GPD NEP RDS NIA and CNW ETE SYR TEP STS  
526 T were generated in rat and affinity purified. The affinity purified RAD21.2 antibody was used in  
527 a dilution of 1:5 in blocking solution for immuno-histochemistry. The peptide synthesis, animal  
528 immunization and affinity purification were outsourced to Eurogentec.

529

530

## 531 **Immuno-FISH**

532 Immuno-FISH was performed using the TACE method (24). Immunofluorescence (IF) antibodies  
533 were used as follows: anti-ASY1 raised in guinea pig 1:10,000, anti-RAD51 raised in rat 1:300,

534 anti-RAD21.2 raised in rat 1:5 (affinity purified), anti-REC8 raised in rabbit 1:250, anti-guinea  
535 pig Alexa488 (Abcam #ab150185) 1:400, anti-rat Alexa568 (Abcam #ab175476) 1:400. 45 rDNA  
536 was detected by using an LNA probe directed against the *SaII* repeats<sup>24</sup>. Slides were mounted in 2  
537  $\mu$ g/ml DAPI diluted in Vectashield (Vectorlabs), imaged on an Axioplan 2 microscope (Carl Zeiss)  
538 and acquired with a mono cool view CCD camera. Z-stacks at 100 nm intervals were recorded,  
539 deconvolved (AutoQuantX software), slice aligned and Z-projected (HeliconFocus software).  
540 RAD51 foci were quantified by manually counting co-localizing signals with the DAPI only. Co-  
541 localization with the 45S rDNA probe was scored if the RAD51 focus overlapped by at least 50 %  
542 with the labeled probe. Global RAD51 detection was performed as described.

543

### 544 **Protein localization analysis by confocal laser scanning microscopy**

545 Anthers expressing the respective fluorescence reporter construct were dissected, transferred onto  
546 a slide with a drop of water and sealed with a cover slip. Images were acquired by using a Leica  
547 TCS SP8 inverted confocal microscope or a Zeiss LSM 880 upright microscope, immediately. The  
548 fluorescent protein mTurquoise was excited at  $\lambda$  458 nm and detected at  $\lambda$  460–510 nm, GFP was  
549 excited at 488 nm and detected at 495–560 nm and TagRFP was excited at 561 nm and detected  
550 at 570–650 nm.

551

### 552 **STED microscopy**

553 The STED slides were prepared as described for the Immuno-FISH with some minor adjustments.  
554 The secondary antibodies used for STED imaging were anti-rat STAR-635P (Abberior) and anti-  
555 rabbit STAR-Orange (Abberior). The slides were mounted in Pro-Long Glass antifade  
556 (Thermofisher) mounting medium. The super resolution images were acquired with a STED-  
557 facility line imaging with a 561 and 640 nm excitation laser with a 775 nm depletion laser.

558

### 559 **RAD21.2 accumulation analysis**

560 To analyze the chromatic features of RAD21.2 accumulations, we performed confocal microscope  
561 analysis of meiocytes expressing *PRO<sub>ASK1</sub>GFP:RAD21.2* and *PRO<sub>H2A.W.6</sub>:H2A.W.6:RFP* at  
562 pachytene. For 20 meiocytes, 3 areas with no accumulation and 3 areas with accumulations of  
563 RAD21.2 were determined. The fluorescence intensity was measured by plot profile in Fiji. For  
564 the accumulation evaluation, the maximum intensity of RAD21.2 fluorescence in each of 3 areas

565 was averaged, and relative intensity was calculated as the ratio of the averaged intensity in the  
566 RAD21.2 accumulated area to the relative intensity of the non-accumulated area.

567

### 568 **Live cell imaging**

569 Live cell imaging of flower buds was performed according to Pursicki et al.<sup>14</sup>. In brief, a single  
570 flower bud was dissected and the stem was embedded into Arabidopsis Apex Culture Medium  
571 (APCM) in a petri dish. The sepal was removed to expose two anthers that were covered by a drop  
572 of APCM with 2% w/v agarose and the petri dish was filled with autoclaved water and placed  
573 under a W-plan Apochromat 40X/1.0 DIC objective. The Zeiss LSM 880 upright confocal  
574 microscope and the ZEN 2.3 SP1 software (Carl Zeiss) were used for the acquisition of time lapses.  
575 For the analysis of the WAPL dependent removal of RAD21.2, a series of Z-stacks (7 planes, 28  
576  $\mu\text{m}$  distance) were acquired at 15 min time intervals. For the analysis of the RAD21.2 dynamics  
577 from premeiosis to pachytene, a series of Z-stacks (10 planes, 45  $\mu\text{m}$ ) at 15 min time intervals  
578 were acquired.

579

### 580 **Image processing**

581 The time lapses were converted to sequential images and a focal plane was selected for each time  
582 point using the function “Review Multi Dimensional Data” of the software Metamorph, version  
583 7.8. Sample drift was corrected by using the Stack Reg plugin of Fiji (version 1.52p)<sup>31</sup>.  
584 For the calculation of the relative intensity of RAD21.2 over the time, time lapses were acquired  
585 from leptotene to metaphase I that was denoted as 0 h. We measured the fluorescence intensity of  
586 nuclei cross sections from 9- 20 meiocytes by using the image processing software Fiji and  
587 background fluorescence was subtracted. From the calculated intensity the background intensity  
588 was subtracted. The highest measured intensity was marked as 100% and used as reference for the  
589 calculation of the RAD21.2 relative intensity for every time point. Representative movies are  
590 shown in the Movie S3 (for the wild-type) and Movie S4 (for *wapl1wapl2*).

591

### 592 **Yeast two-hybrid assay**

593 The *SMC1* and *SCC3* constructs were generated as described previously<sup>19</sup>. To generate the  
594 *RAD21.2* construct, the coding sequence was amplified by PCR with primers flanking *NdeI* and  
595 *NhoI* restriction sites and was subcloned into the *pGADT7* vector by using the T4 Ligase. To  
596 generate the *REC8* construct, the coding sequence was amplified by PCR with primers flanked by

597 *attB* sites and subcloned into the *pDONR221* vector by BP clonase reaction. The resulting construct  
598 was integrated into the *pGADT7-GW* vector by gateway LR reaction. Primers used for generating  
599 the constructs are listed in Supplementary Table S2. The yeast two-hybrid assays were performed  
600 according to the Matchmarker Gold Yeast two-hybrid system manual from Clontech. Different  
601 variations of the constructs were co-transformed by the polyethylene glycol/ lithium acetate  
602 method into the *AH109* yeast strain and selected on SD/-Leu-Trp plates. The interactions were  
603 tested on SD/-Leu-Trp-His plates.

604

### 605 **Plant material collection for protein extraction**

606 2 week old seedlings expressing *PRO<sub>35S</sub>:GFP* or *PRO<sub>ASK1</sub>:GFP:RAD21.2* were grown on ½ MS  
607 plates. Around 0.1 g seedlings was collected in a precooled tube and immediately frozen in liquid  
608 nitrogen.

609

### 610 **Protein Sample preparation and LC-MS/MS data acquisition**

611 Plant material was ground to a fine powder and covered by the extraction buffer (50 mM Tris pH  
612 7.5, 150 mM NaCl, 10 Glycerol, 2mM EDTA, 5mM DTT, 1% Triton X-100, 10µl/ml plant  
613 protease inhibitor (Sigma #P9599)). The extraction was performed for 1 hour on ice with mixing  
614 the solution in between. The solution was centrifuged for 30 min at 4°C. The supernatant was  
615 collected in a new tube and the centrifugation step was repeated until no pellet was left. For the  
616 enrichment, 50 µl of GFP-Trap Magnetic beads (Chromotek) were equilibrated with ice cold wash  
617 buffer (50 mM Tris pH 7.5, 150 mM NaCl, 10 Glycerol, 2mM EDETA) according to the manual.  
618 Total protein and magnetic beads were mixed and incubated overnight at 4°C on a rolling wheel.  
619 The followed wash steps were performed according to the manual and magnetic beads were frozen  
620 at -20°C until on-bead digestion was performed. For the on-bead digestion, dry beads were re-  
621 dissolved in 25 µL digestion buffer 1 (50 mM Tris, pH 7.5, 2M urea, 1mM DTT, 5 ng/µL trypsin)  
622 and incubated for 30 min at 30 °C in a Thermomixer with 400 rpm. Next, beads were pelleted and  
623 the supernatant was transferred to a fresh tube. Digestion buffer 2 (50 mM Tris, pH 7.5, 2M urea,  
624 5 mM CAA) was added to the beads, after mixing the beads were pelleted, the supernatant was  
625 collected and combined with the previous one. The combined supernatants were then incubated  
626 o/n at 32 °C in a Thermomixer with 400 rpm; samples were protected from light during incubation.  
627 The digestion was stopped by adding 1 µL TFA and desalted with C18 Empore disk membranes  
628 according to the StageTip protocol<sup>32</sup>. Dried peptides were re-dissolved in 2% ACN, 0.1% TFA (10

629  $\mu\text{L}$ ) for analysis and diluted to  $0.2 \mu\text{g}/\mu\text{L}$ . Samples were analyzed using an EASY-nLC 1000  
630 (Thermo Fisher) coupled to a Q Exactive mass spectrometer (Thermo Fisher). Peptides were  
631 separated on 16 cm frit-less silica emitters (New Objective,  $0.75 \mu\text{m}$  inner diameter), packed in-  
632 house with reversed-phase ReproSil-Pur C18 AQ  $1.9 \mu\text{m}$  resin (Dr. Maisch). Peptides were loaded  
633 on the column and eluted for 115 min using a segmented linear gradient of 5% to 95% solvent B  
634 (0 min : 5%B; 0-5 min -> 5%B; 5-65 min -> 20%B; 65-90 min ->35%B; 90-100 min -> 55%; 100-  
635 105 min ->95%, 105-115 min ->95%) (solvent A 0% ACN, 0.1% FA; solvent B 80% ACN,  
636 0.1%FA) at a flow rate of 300 nL/min. Mass spectra were acquired in data-dependent acquisition  
637 mode with a TOP15 method. MS spectra were acquired in the Orbitrap analyzer with a mass range  
638 of 300–1750 m/z at a resolution of 70,000 FWHM and a target value of  $3 \times 10^6$  ions. Precursors  
639 were selected with an isolation window of 2.0 m/z (Q Exactive). HCD fragmentation was  
640 performed at a normalized collision energy of 25. MS/MS spectra were acquired with a target  
641 value of  $10^5$  ions at a resolution of 17,500 FWHM, a maximum injection time (max.) of 120 ms  
642 and a fixed first mass of m/z 100. Peptides with a charge of +1, greater than 6, or with unassigned  
643 charge state were excluded from fragmentation for MS2, dynamic exclusion for 30s prevented  
644 repeated selection of precursors.

645

## 646 **Data analysis**

647 Raw data were processed using MaxQuant software (version 1.5.7.4) with label-free quantification  
648 (LFQ) and iBAQ enabled<sup>33</sup>. MS/MS spectra were searched by the Andromeda search engine  
649 against a combined database containing the sequences from *A. thaliana* (TAIR10\_pep\_20101214)  
650 and sequences of 248 common contaminant proteins and decoy sequences<sup>34</sup>. Trypsin specificity  
651 was required and a maximum of two missed cleavages allowed. Minimal peptide length was set to  
652 seven amino acids. Carbamidomethylation of cysteine residues was set as fixed, oxidation of  
653 methionine and protein N-terminal acetylation as variable modifications. Peptide-spectrum-  
654 matches and proteins were retained if they were below a false discovery rate of 1%. Statistical  
655 analysis of the MaxLFQ values was carried out using Perseus (version 1.5.8.5). Quantified proteins  
656 were filtered for reverse hits and hits “identified by site” and MaxLFQ values were log2  
657 transformed. After grouping samples by condition only those proteins were retained for the  
658 subsequent analysis that had two valid values in one of the conditions. Missing values were  
659 imputed from a normal distribution (1.8 downshift, separately for each column). Volcano plots

660 were generated in Perseus using an FDR of 6% and an  $S0=1$ . Perseus output was exported and  
661 further processed using Excel.

662

### 663 **qRT-PCR**

664 Expression analysis of *RAD21.2* in seedlings and flower buds was performed by qRT-PCR. Plant  
665 material was collected and grinded to fine powder. RNA extraction was performed according to  
666 the manual of the RNeasy Plant Mini kit (Qiagen). A DNase treatment was added before the first  
667 washing step. Finally, the RNA concentration was determined and 1  $\mu$ g RNA was used for the  
668 cDNA synthesis according to the Transcriptor First Strand cDNA Synthesis kit (Roche). The  
669 expression of the following genes *FTSH7* (AT3G47060), *COX11* (AT1G02410) and AT2G41960  
670 was used as reference. The expression of each gene was analyzed using the primers listed in  
671 Supplementary Table S. The qRT-PCR was performed using the Light Cycler 480 SYBR Green I  
672 Master (Roche) in triplicates. Following conditions were used; pre-incubation: 95°C 5 min,  
673 amplification: 95°C 10 s, 58°C 10 s, 72°C 10 s; 45 cycles. The experiment was performed in a  
674 Light Cycler 480 System (Roche).

675

### 676 **Quantitative PCR**

677 4-week-old leaves of T<sub>2</sub> *RAD21.2 RNAi* #1 were collected and grinded to fine powder. DNA was  
678 extracted by using the DNeasy Plant Pro kit (Qiagen). The qPCR was performed in triplicates and  
679 1.5 ng DNA was used. To quantify the relative *18S* gene number primers, previously described,  
680 were used<sup>21</sup>. To calculate the relative 18S quantity the *HXK1* (AT4G29130) and *UEVIC*  
681 (AT2G36060) genes were used for normalization. Following conditions were used; pre-  
682 incubation: 95°C 7 min, amplification: 95°C 30 s, 56°C 30 s, 72°C 30 s; 40 cycles. The experiment  
683 was performed in a Light Cycler 480 System (Roche).

684 For detecting the copy number variation within the same individual, rosette leaves of different  
685 sizes, representing different ages, were collected from bottom to top as follows  $t_0 = 1$  cm leaves,  
686  $t_1 = 1.5$  cm,  $t_2 = 2.5$  cm,  $t_3 = 3.5$  cm. Four leaves per time point per individual were taken for the  
687 analysis.

688

### 689 **Statistical analysis**

690 Student's t-test (two-tailed) was used to evaluate the significance of the difference between two  
691 groups. For the analysis of variance, two samples F-test was performed. The numbers of samples

692 are indicated in the figure legend. The strength of significance is presented by the p-values. \*, $P <$   
693 0.05; \*\*, $P <$  0.01; and \*\*\*, $P <$  0.001. Unpaired, two-tailed Mann-Whitney tests were performed,  
694 since D'Agostino Pearson omnibus K2 normality testing revealed that most data were not sampled  
695 from a Gaussian population, and nonparametric tests were therefore required.

## 696 **Tables S1 to S3**

697 **Table S1:** Proteins identified by IP\_RAD21.2 vs. GFP

699 **Table S2:** Oligonucleotides used in this study

700

## 701 **Figs. S1 to S7**

702

703 **Fig. S1. Mitotic and meiotic localization of RAD21.1 and RAD21.3:** Confocal laser scanning  
704 micrographs of Arabidopsis root tips (I, II) and anthers (III) expressing *PRO<sub>RPS5</sub>:RFP:TUA5*  
705 together with *PRO<sub>RAD21.1</sub>:RAD21.1:GFP* (A) and *PRO<sub>RAD21.3</sub>:GFP:RAD21.3* (B). (I) Depicts an  
706 overview of the root tip. Scale bar: 50  $\mu$ m. (II) Close-up showing the localization pattern of RAD21  
707 fusion proteins on chromosomes in the metaphase plane. Scale bar: 5  $\mu$ m. (III) Upper row:  
708 RAD21.1 and RAD21.3 but not REC8 are present in all cells prior to meiosis (close-up highlighted  
709 in box). Lower row: next to REC8, neither RAD21.1 nor RAD21.3 accumulate in meiosis (here  
710 pachytene stage) but are present in the surrounding somatic tissue. Scale bar: 20  $\mu$ m.

711

712 **Fig. S2. RAD21.2 localization in Arabidopsis root cells overlaps with H2A.W.6:** A, Confocal  
713 laser scanning micrographs of Arabidopsis root tips (I) expressing *PRO<sub>RPS5</sub>:RFP:TUA5* together  
714 with *PRO<sub>RAD21.2</sub>:GFP:RAD21.2*. (I) Overview of the root tip. Scale bar: 50  $\mu$ m. (II) Close-up  
715 showing the localization pattern of RAD21 fusion proteins on chromosomes in the metaphase  
716 plane. Scale bar: 5  $\mu$ m. B, Upper panel: Confocal laser scanning micrograph of an anther  
717 expressing *PRO<sub>RAD21.2</sub>:RAD21.2:GFP* (green) and *PRO<sub>REC8</sub>:REC8:GFP* (magenta) at early  
718 pachytene stage. Lower panel: Confocal laser scanning micrograph of an anther expressing  
719 *PRO<sub>RAD21.2</sub>:GFP:RAD21.2* (green) and *PRO<sub>REC8</sub>:REC8:GFP* (magenta) at pachytene stage.  
720 Arrowheads show RAD21.2 clusters. Scale bar: 20  $\mu$ m. C, Confocal laser scanning micrographs  
721 of Arabidopsis root tip cells expressing *PRO<sub>ASK1</sub>:GFP:RAD21.2* (green) and  
722 *PRO<sub>H2A.W.6</sub>:H2A.W.6:RFP* (magenta) in root cells. Overlapping regions are marked with  
723 arrowheads. Scale bar: 5  $\mu$ m. D, Confocal laser scanning micrographs of Arabidopsis root tip cells

724 expressing *PRO<sub>RAD21.2</sub>:GFP:RAD21.2* (green) and *PRO<sub>PCNA1</sub>:PCNA1:RFP* (magenta) depicting  
725 cell cycle-dependent dynamics of RAD21.2 in root cells. Scale bar: 5  $\mu$ m.

726

727 **Fig. S3. GFP:RAD21.2 reporters complement the *rad21.2* phenotype and show a specific pre-**  
728 **and post-meiotic localization pattern: A,** *RAD21.2* reporter complementation assays. Peterson  
729 staining of mature pollen. Aborted pollen is identifiable by blue color and shrunken appearance  
730 (arrowhead). Aborted seeds are highlighted by arrowheads. Phenotypes of the wild-type, *rad21.2*  
731 heterozygous mutants, and plants carrying either of the reporter constructs  
732 *PRO<sub>RAD21.2</sub>:GFP:RAD21.2* and *PRO<sub>ASK1</sub>:GFP:RAD21.2*. Heterozygous mutants for *RAD21.2*  
733 show a 40% pollen and 50% seed viability reduction. Scale bar for seed analysis: 1000  $\mu$ m; scale  
734 bar for pollen analysis: 100  $\mu$ m. **B,** Yeast two-hybrid interaction assay of RAD21.2 and REC8  
735 with the core cohesin components SMC1 and SCC3. The left panel shows the autoactivation tests  
736 for all analyzed constructs. The right panel shows the results of the interaction analyses. Different  
737 dilutions of yeast ( $10^{-1}/10^{-2}/10^{-3}$ ) were spotted on SD plates lacking leucine, tryptophan and  
738 histidine (-L/-W/-H) to test for interaction strength.

739

740 **Fig. S4. RAD21.2 interacts with core cohesin components and co-precipitates with proteins**  
741 **associated with heterochromatin: A,** Volcano plot of proteins identified by mass spectrometry.  
742 The x-axis depicts the fold change value, and the y-axis shows the significance by the  $-\log_{10}$  (p-  
743 value). Proteins were extracted from seedlings. Interaction partners that are significantly enriched  
744 in the RAD21.2 IP sample are shown in magenta. Other identified proteins are shown in grey  
745 (Table S1). **B,** Confocal laser scanning micrographs of cells expressing *PRO<sub>ASK1</sub>:GFP:RAD21.2*  
746 (green) and *PRO<sub>FIB2</sub>:FIB2:TFP* (cyan) in pre-meiosis indicating a nuclear localization of RAD21.2  
747 with nucleolar protruding regions (arrowhead) at pre-meiosis (upper panel) and non-protruding  
748 regions at pachytene stage (lower panel). Scale bar: 1  $\mu$ m. **C,** Confocal laser scanning micrographs  
749 of cells expressing *PRO<sub>RAD21.2</sub>:GFP:RAD21.2* (green) at the end of meiosis II, tetrad, microspore  
750 and bicellular pollen stages. Scale bar: 1  $\mu$ m. **D,** Two representative images of Lipsol spread nuclei  
751 imaged in super-resolution using STED microscopy. REC8 is shown in magenta and RAD21.2 in  
752 green. Nuclei are at zygotene stage. Scale bar: 2  $\mu$ m.

753

754



755 **Fig. S5. RAD21.2 is not regulated by the WAPL-dependent prophase I pathway and**  
756 **RAD21.2 localization is REC8-independent:** **A**, Quantification of the relative  
757  $PRO_{ASK1}:GFP:RAD21.2$  accumulation levels in wild-type (dark grey) versus *wapl1 wapl2* (light  
758 grey) meiocytes over time. At least 9 meiocytes were analyzed per genotype, error bars depict the  
759 standard error. Meiotic stages are indicated below (see Movies S3 and S4). **B**, Expression of  
760  $PRO_{ASK1}:GFP:RAD21.2$  does not complement the sterility of *rec8* mutants as seen by the short (**B**)  
761 and empty (**C**) siliques. Scale bar: 1000  $\mu$ m. Description for panel C is missing. **D**, Confocal laser  
762 scanning micrograph of an anther expressing  $PRO_{ASK1}:GFP:RAD21.2$  in *rec8* shows the typical  
763 chromosomal localization pattern of GFP:RAD21.2 at pachytene; see Fig. 1 for comparison.

764

765 **Fig. S6. RAD21.2 localization is not compromised in *ddm1* and *nuc2* mutant meiocytes:** **A**,  
766 Confocal laser scanning micrographs of anthers expressing  $PRO_{ASK1}:GFP:RAD21.2$  in *ddm1* and  
767 *nuc2* mutants showing the typical chromosomal localization pattern of GFP:RAD21.2 (green) from  
768 pre-meiosis to pachytene compared to wild-type. **B**, Immuno-FISH analysis of wild-type pollen  
769 mother cells at zygotene. The axis has been stained with anti-ASY1 (magenta) for staging and the  
770 RAD21.2 by anti-RAD21.2 (green). The 45S rDNA has been visualized with a specific FISH probe  
771 (white). Scale bar: 5  $\mu$ m.

772

773

774 **Fig. S7. Knockdown of RAD21.2 results in reduced fertility:** **A** Normalized relative expression  
775 levels of *RAD21.2* in seedlings (dark grey) and in flower buds (light grey) in the *RAD21.2 RNAi*  
776 lines #1 and #2 compared to the wild type. **B**, **C** *RAD21.2* RNAi plants (line #1) have somatically  
777 visible defects but have shorter siliques than the wild type. **D**, *RAD21.2* RNAi plants (line #1 left,  
778 and line #2 right) have dead pollen (examples marked by arrowheads) and aborted and unfertilized  
779 ovules (examples are marked by arrowheads). Scale bar for silique analysis: 1000  $\mu$ m, scale bar  
780 for pollen analysis: 100  $\mu$ m. **E**, Quantification of the fertility defects in *RAD21.2 RNAi* plants. **F**,  
781 F1 cross between *RAD21.2* RNAi #1 and Col-0 show no severe pairing defects indicating that no  
782 translocation events have occurred while selecting for the *RAD21.2* RNAi line.

783

784

785

786

787

788

789

790

791

792

793

794

795

796

797

798

799

800

801

802

803

804

805

806

807

808

809

810

811

812

813

814

**Fig. S8. *RAD21.2 RNAi* plants have severe chromosome rearrangements:** **A**, Chromosome spread analysis of pollen mother cells of the *RAD21.2 RNAi* line #2. Scale bar: 20  $\mu$ m. **B**, FISH analysis of metaphase I (I/II) and prophase II (III) of pollen mother cells from *RAD21.2 RNAi* line #1. DNA was visualized by DAPI (grey), probes against the 45S rDNA (cyan), 5S rDNA (red) and CEN (green) regions were used to identify chromosomes. Several arrangements of non-homologous chromosome were found, e.g. chromosomes 3 and 4 (I) and chromosome 5 with 3 and 3 with 4 (II). An arrowhead indicates a 45S chromosome fragment (III). Scale bar: 10  $\mu$ m. **C**, FISH analysis of metaphase I (I/II) of pollen mother cells from *RAD21.2 RNAi* line #2. DNA was visualized by DAPI (grey), probes against the 45S rDNA (cyan), 5S rDNA (red) and CEN (green) regions were used to identify chromosomes. Interconnections of chromosomes 2 and 4 were visible (I). Panel (IIa) depicts the magnification of the marked area in (II) highlighting connections between chromosomes 2 and 4 via the 45S region and between chromosomes II and III via the centromeric region. Scale bar: 10  $\mu$ m. **D**, Graph depicting the 18S gene copy number in leaves of different sizes of Col-0 and *RAD21.2 RNAi* line #1. The results show that there is loss of 18S copy number occurring within the same individual, indicating there is no somatic loss of the rDNA.

## Movies S1 to S4

**Movie S1. Dynamics of *RAD21.1* in mitotically dividing root cells:** Live cell imaging of root tips expressing PRO<sub>RPS5</sub>:RFP:TUA5 (magenta) together with PRO<sub>RAD21.1</sub>:RAD21.1:GFP (green). A typical cohesin localization pattern was observed, characterized by chromatin association and disappearance at anaphase onset. The fluorescence signal of PRO<sub>RAD21.1</sub>:RAD21.1:GFP reappears in the nuclei of the daughter cells after mitosis. Time interval of image acquisition is 20 s.

**Movie S2. Pre-meiotic *RAD21.2* dynamics:** Live cell imaging of anthers expressing PRO<sub>ASK1</sub>:GFP:RAD21.2. RAD21.2 (grey) accumulates in small foci in the nuclei of pre-meiotic cells and the surrounding tapetum cells. Time interval of image acquisition is 15 min.

815 **Movie S3. RAD21.2 dynamics from leptotene to anaphase I in the wild-type:** Live cell imaging  
816 of wild-type flower buds expressing PRO<sub>ASK1</sub>:GFP:RAD21.2. RAD21.2 (grey) is enriched at  
817 distinct chromosome regions. Time interval of image acquisition is 15 min.

818

819 **Movie S4. RAD21.2 dynamics from leptotene to anaphase I in *wapl1 wapl2* double mutants:**  
820 Live cell imaging of *wapl1 wapl2* flower buds expressing PRO<sub>ASK1</sub>:GFP:RAD21.2. Loss of WAPL  
821 function does not affect the localization and abundance pattern of RAD21.2 (grey). Time interval  
822 of image acquisition is 15 min.

Figure S1

A

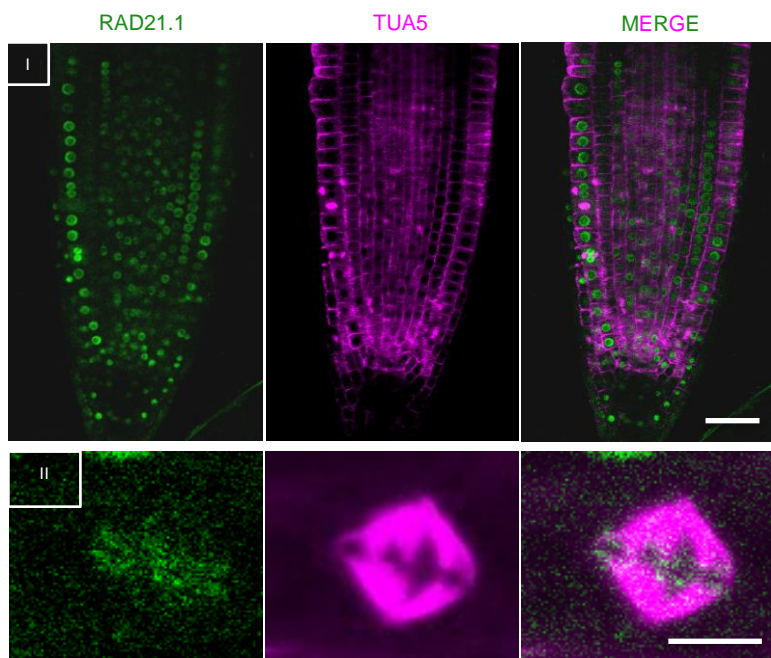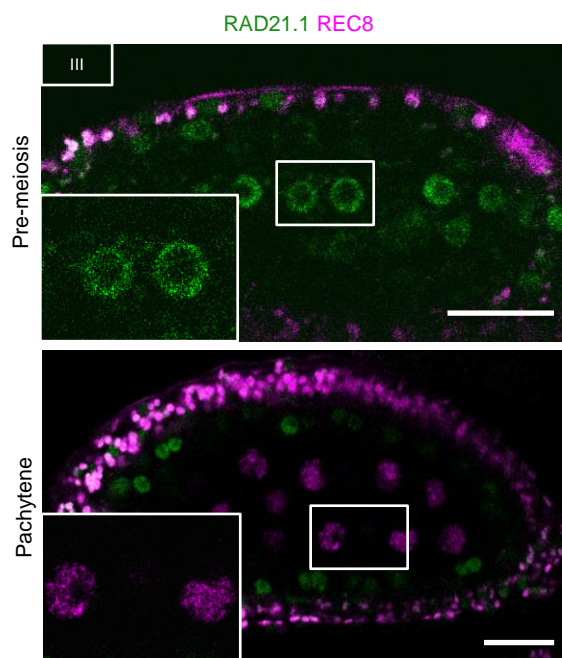

B

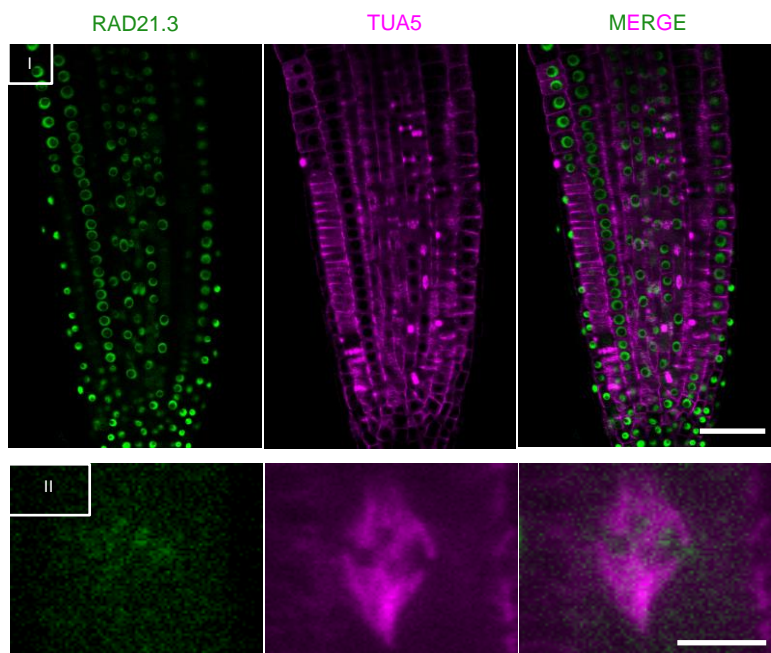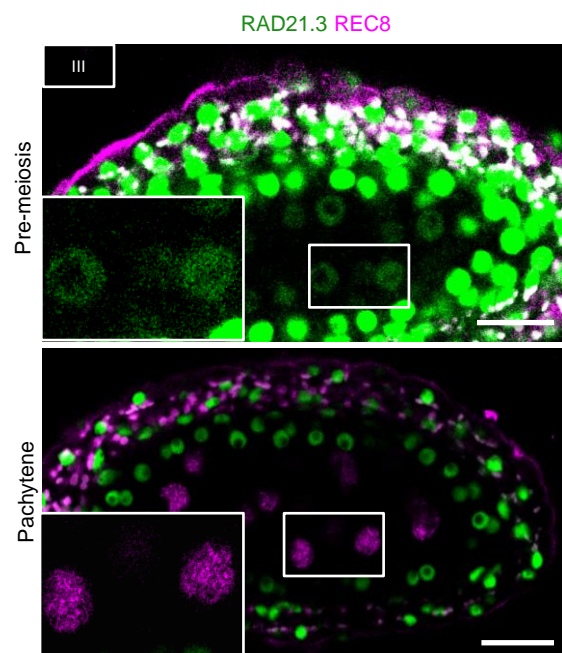

**Figure S2**

**A**

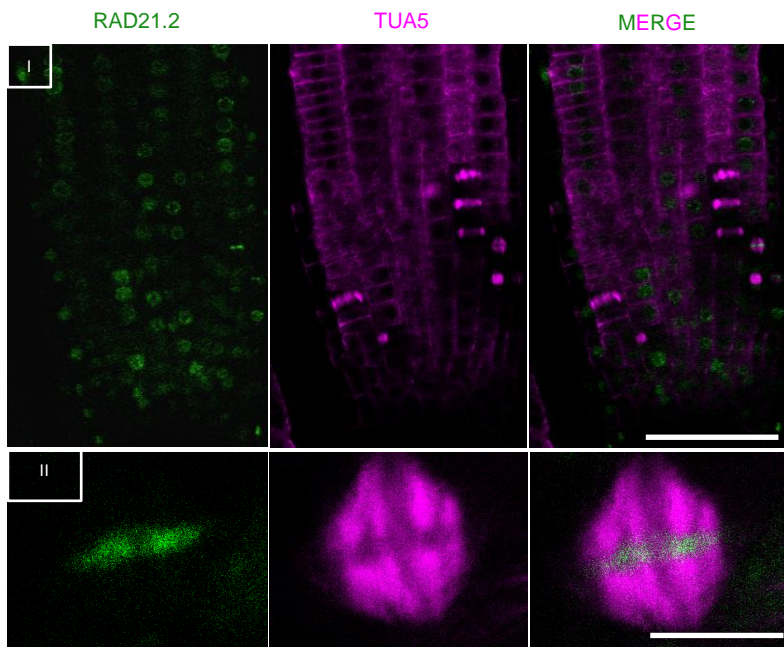

**B**

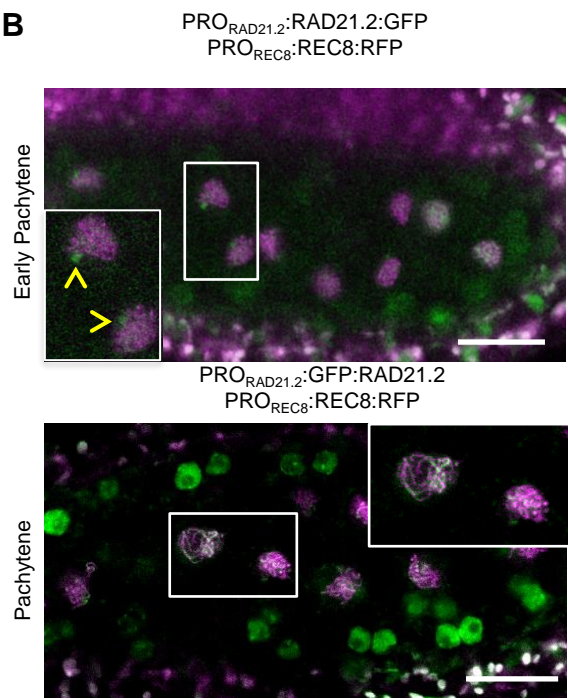

**C**

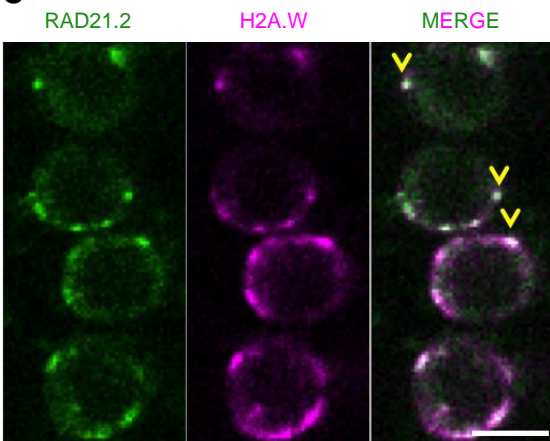

**D**

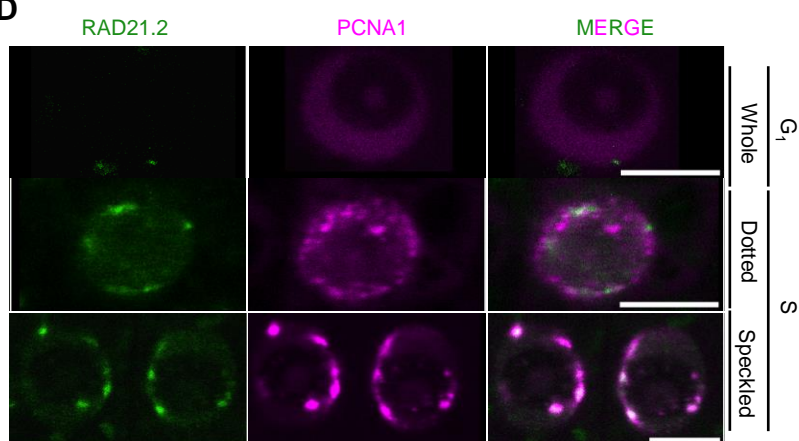

**Figure S3**

**A**

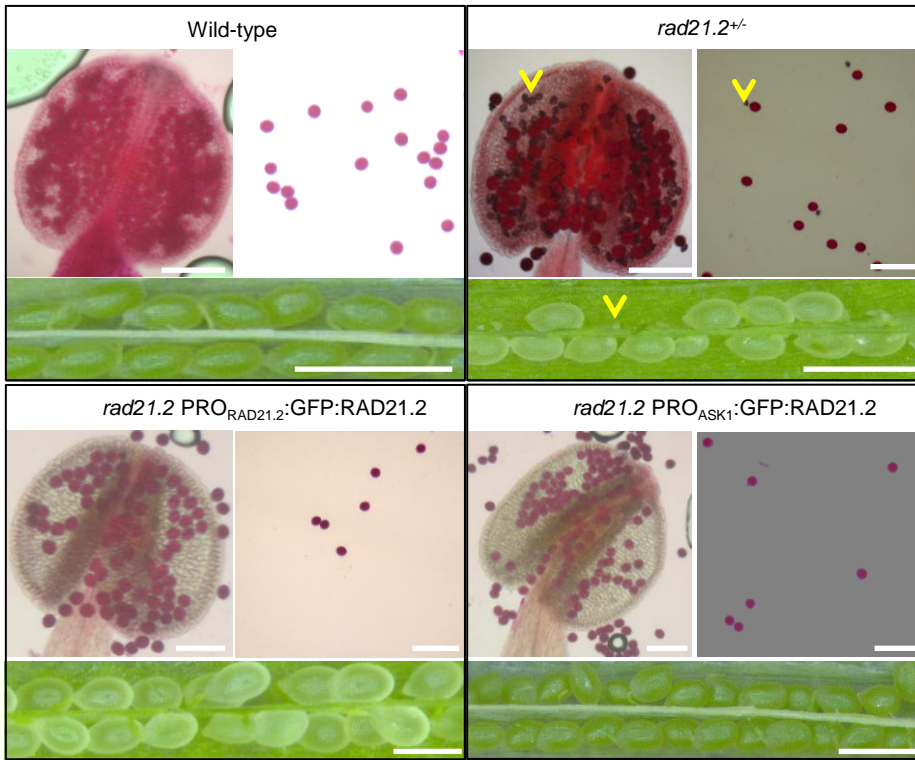

**B**

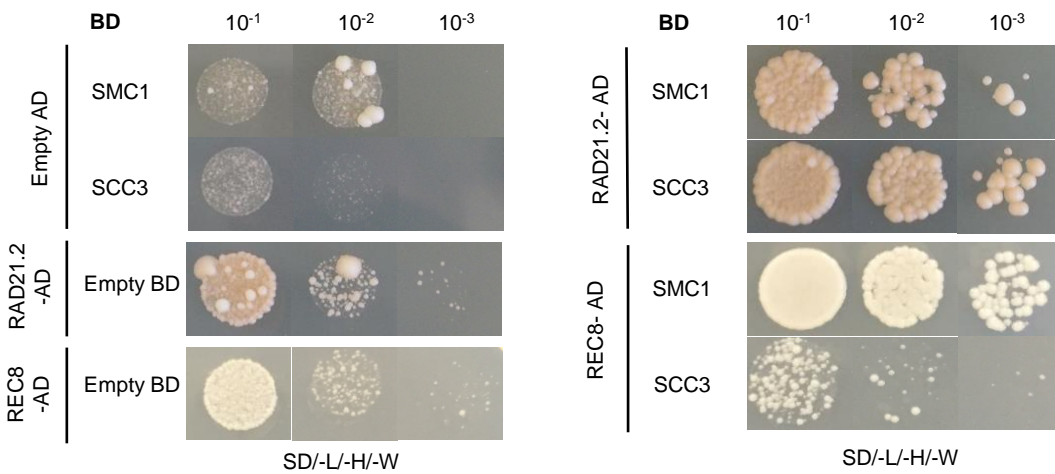

Figure S4

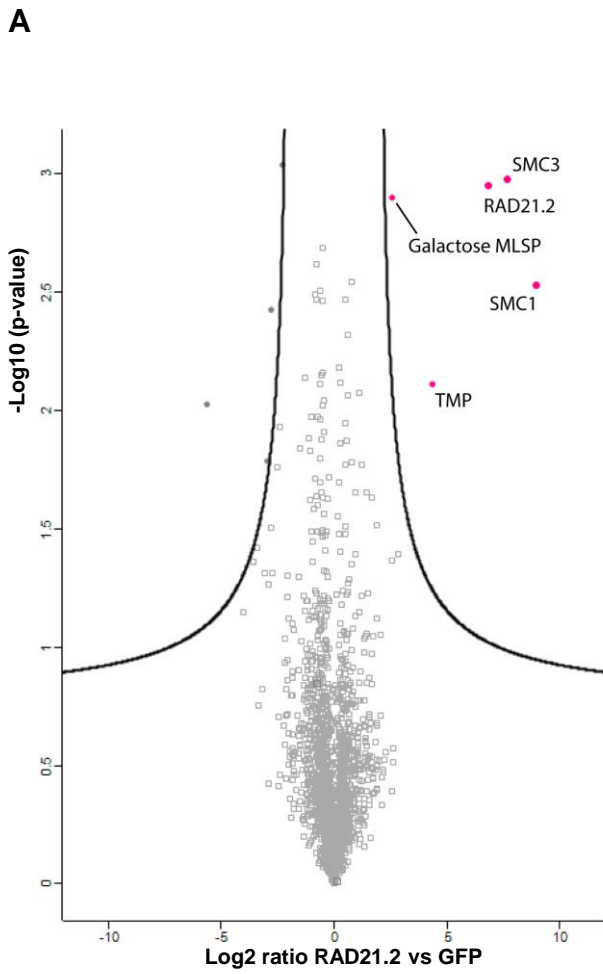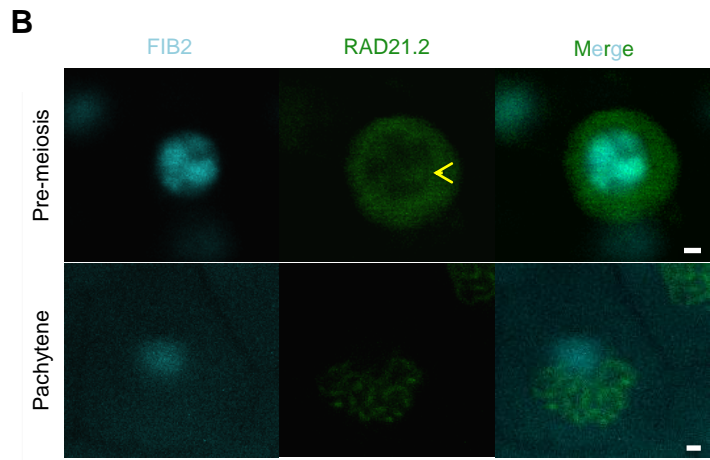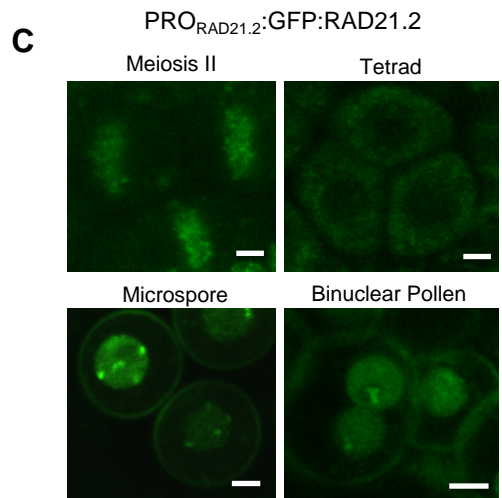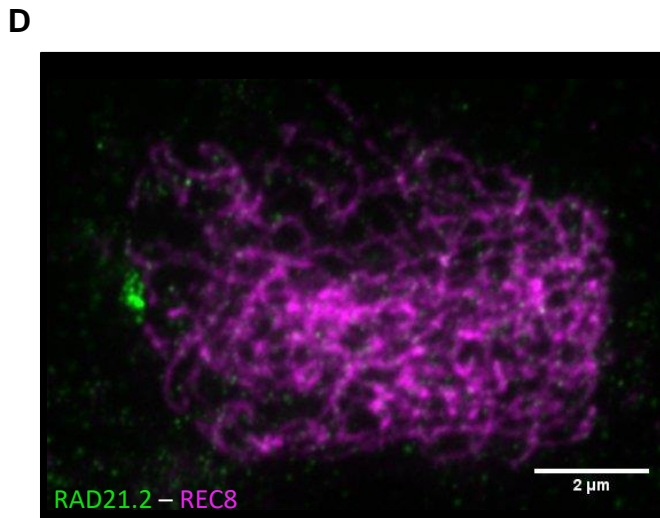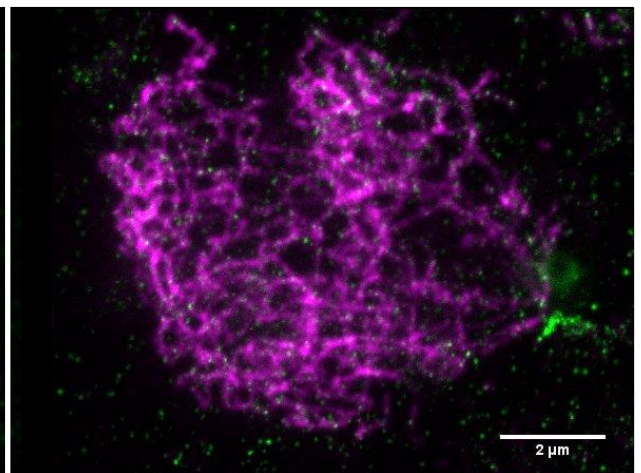

**Figure S5****A**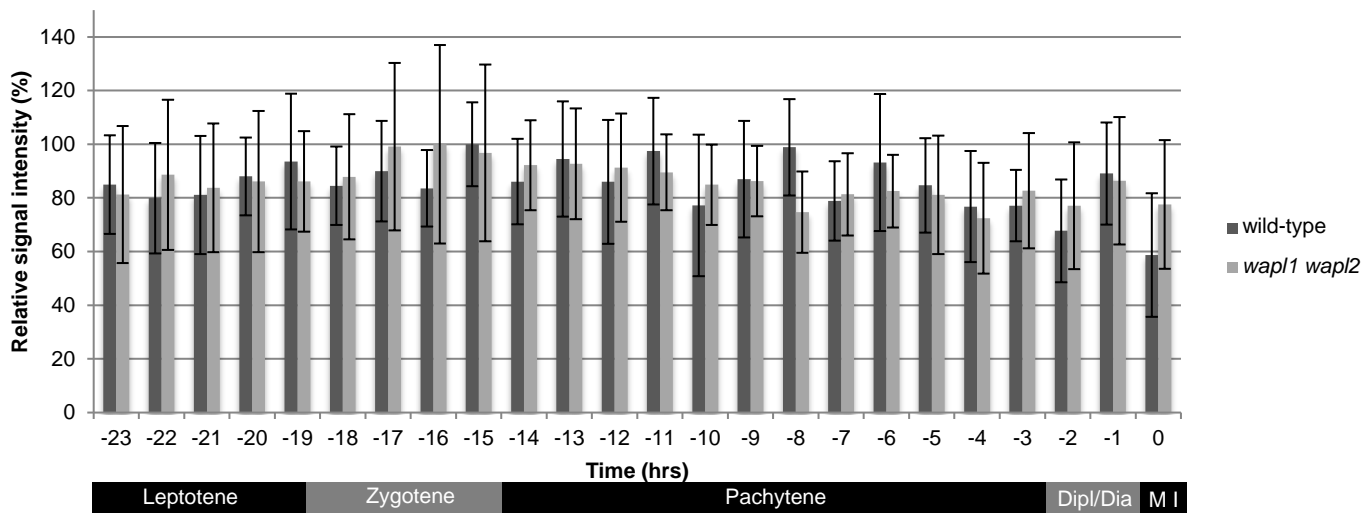**B**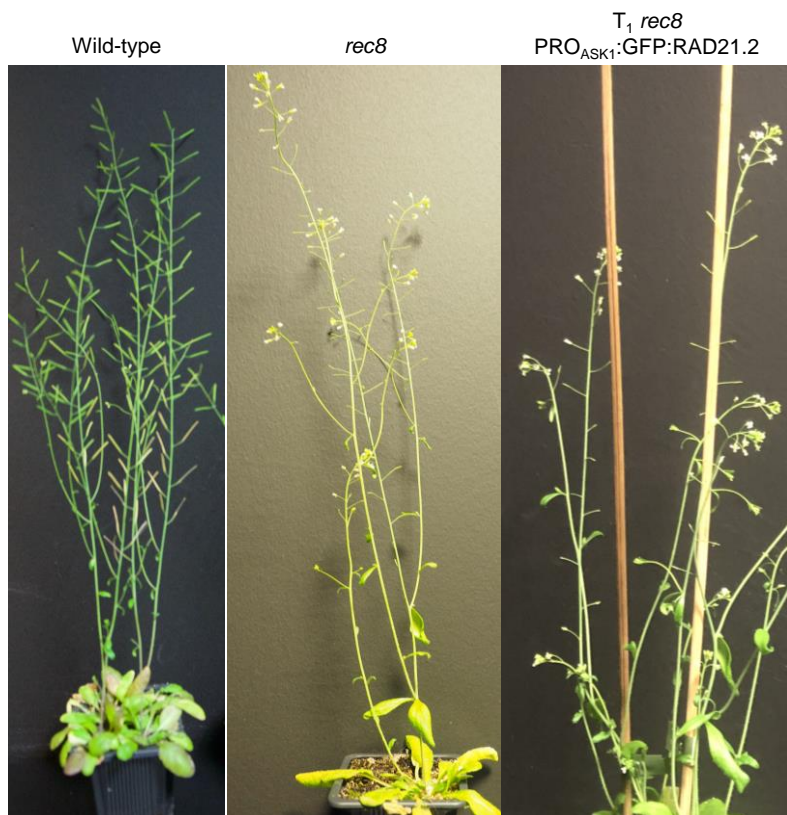**C**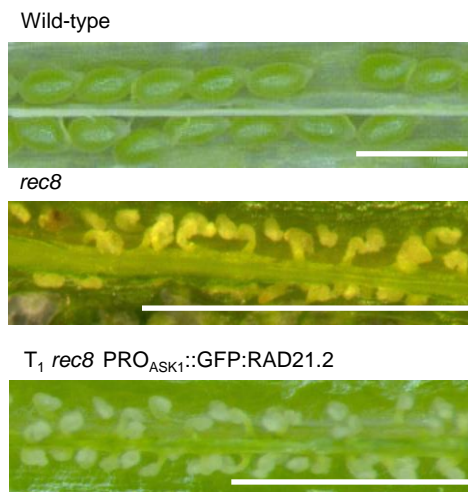**D**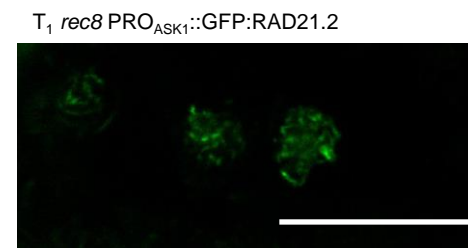



**Figure S6**

**A**

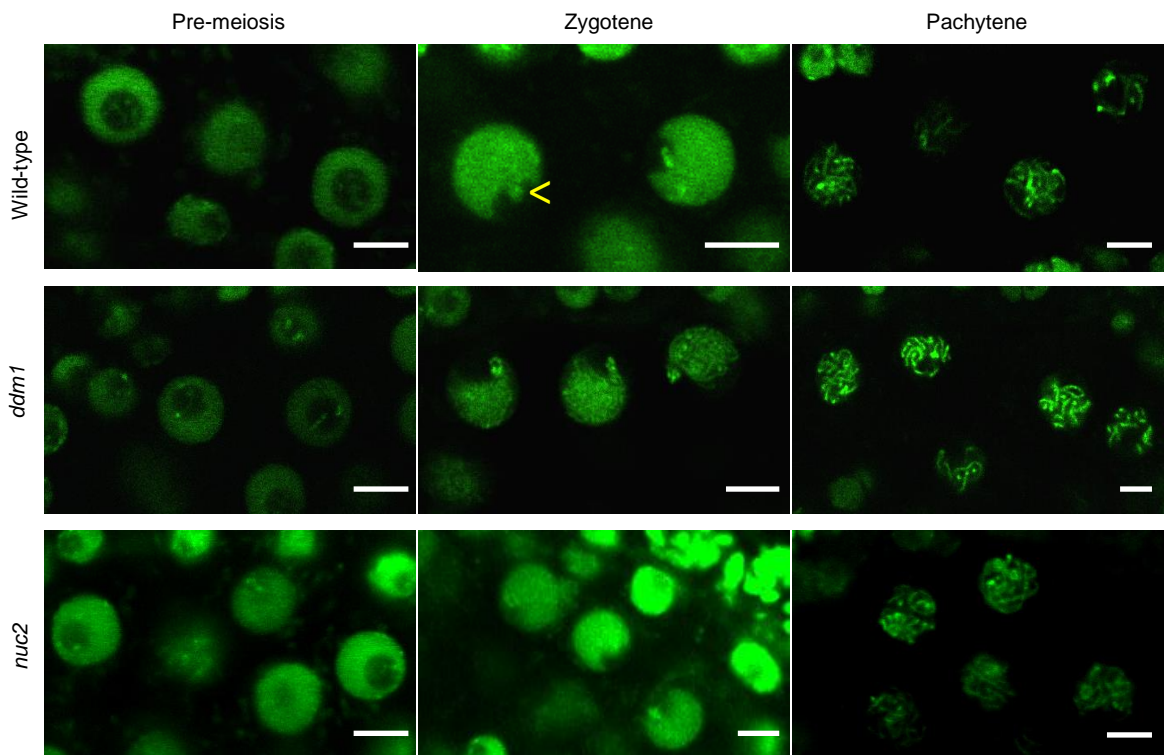

**B**

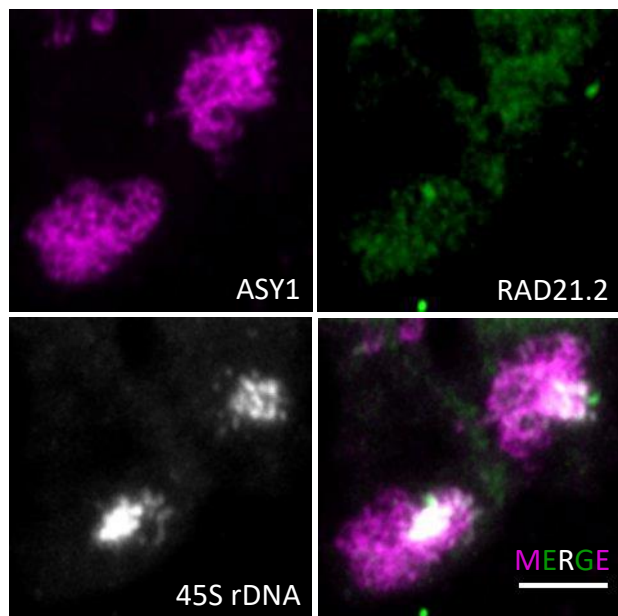

**Figure S7****A**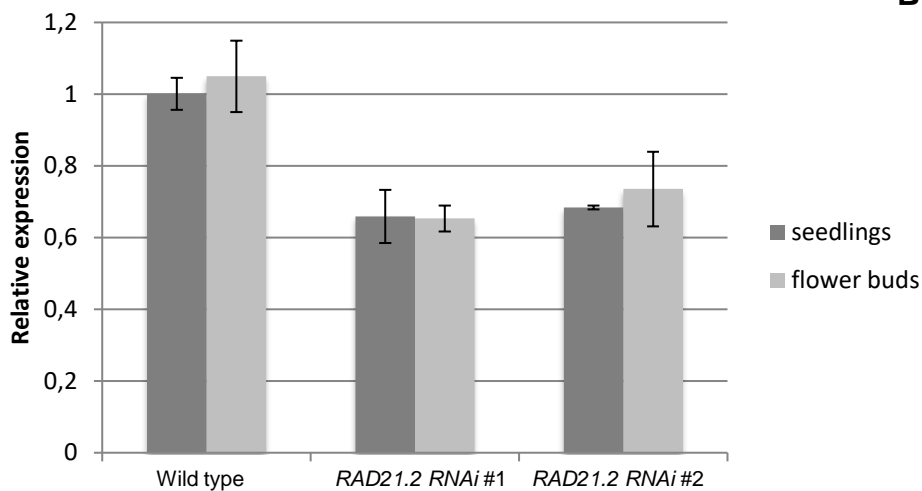**B**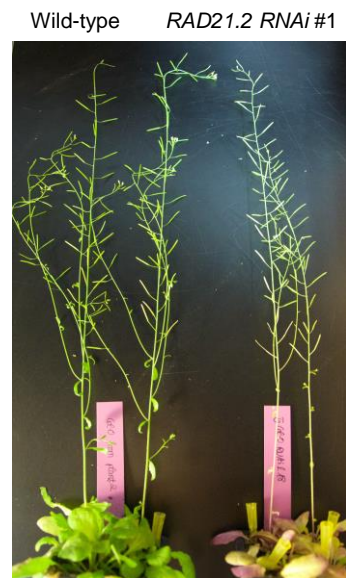**C**Wild type *RAD21.2 RNAi #1*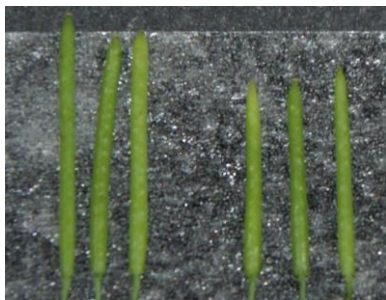**D**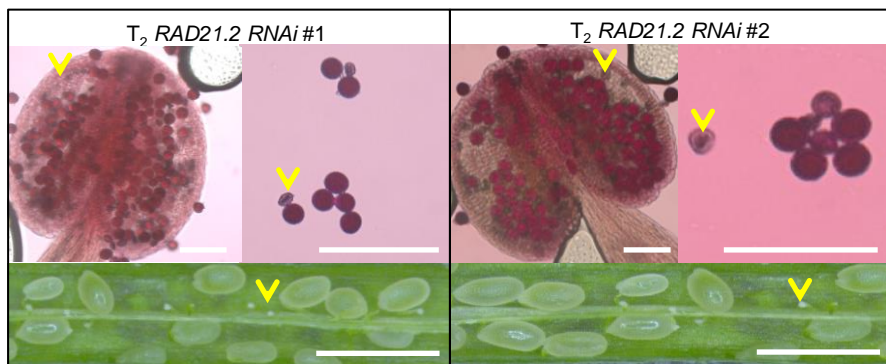**E**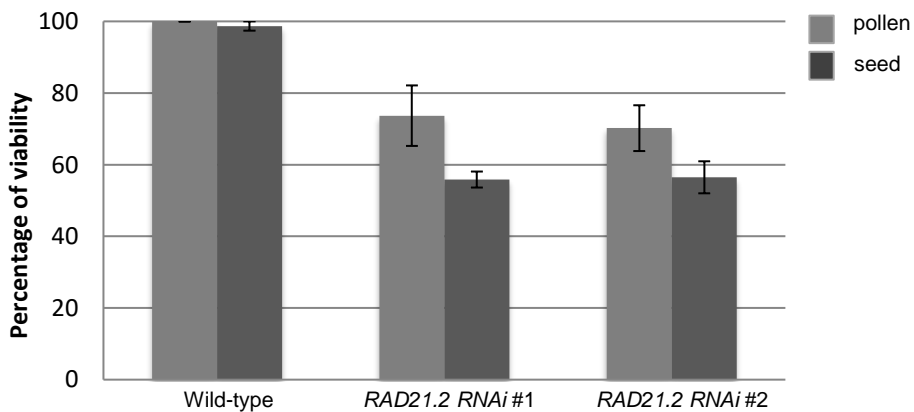**F**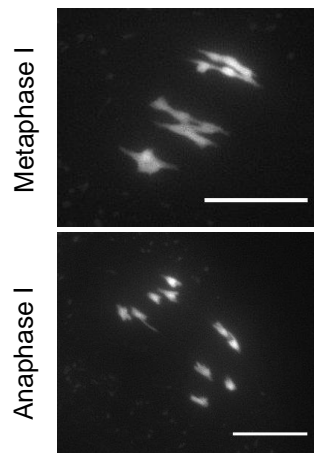

**Figure S8**

**A**

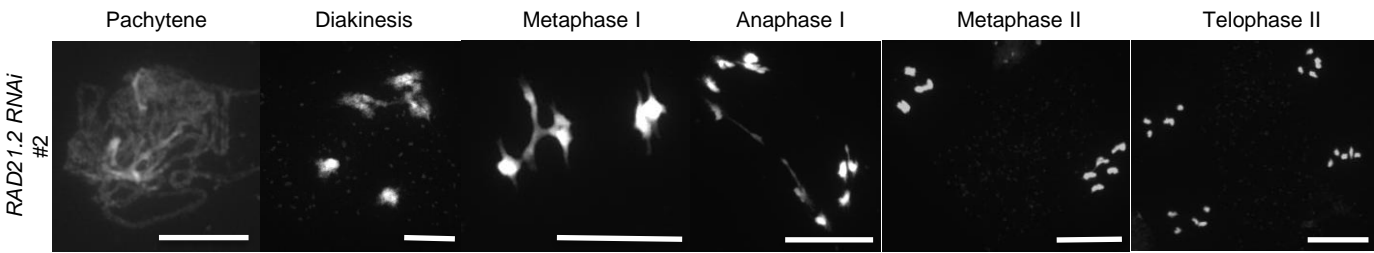

**B**

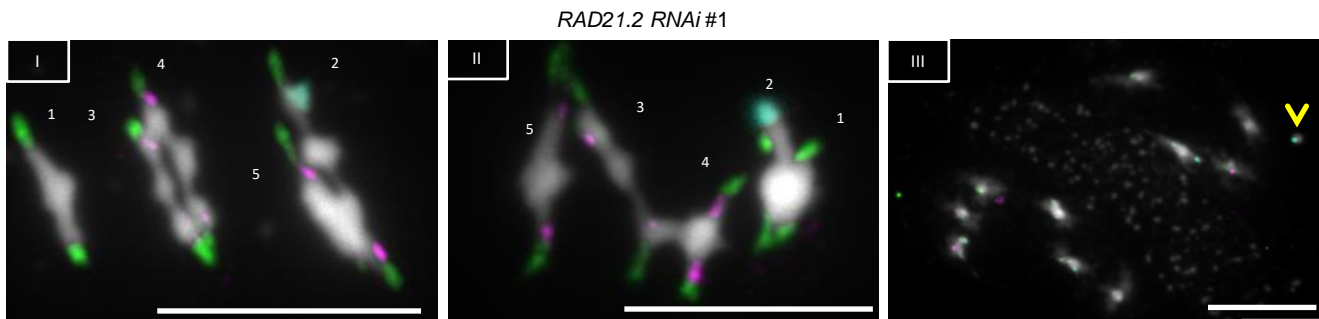

**C**

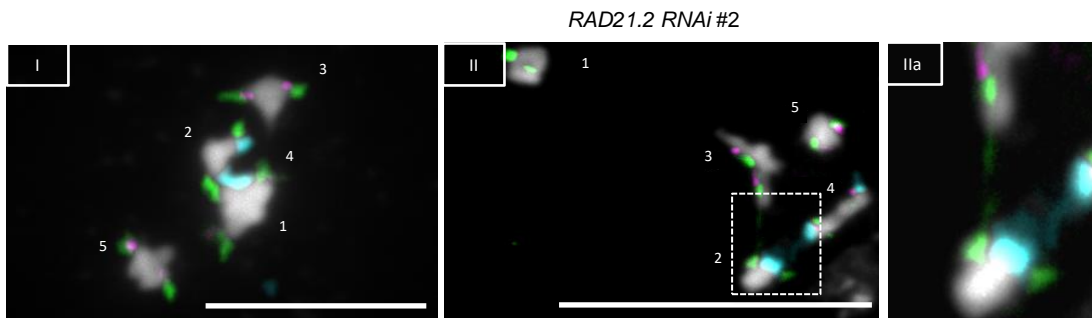

**D**

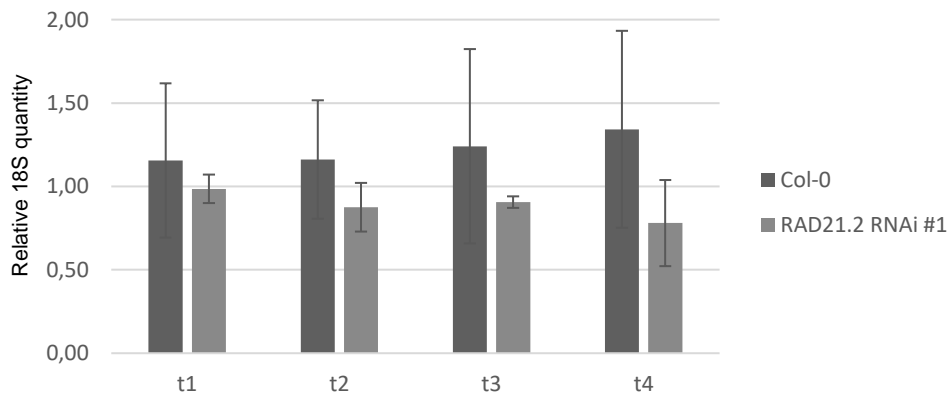

**Figure 1**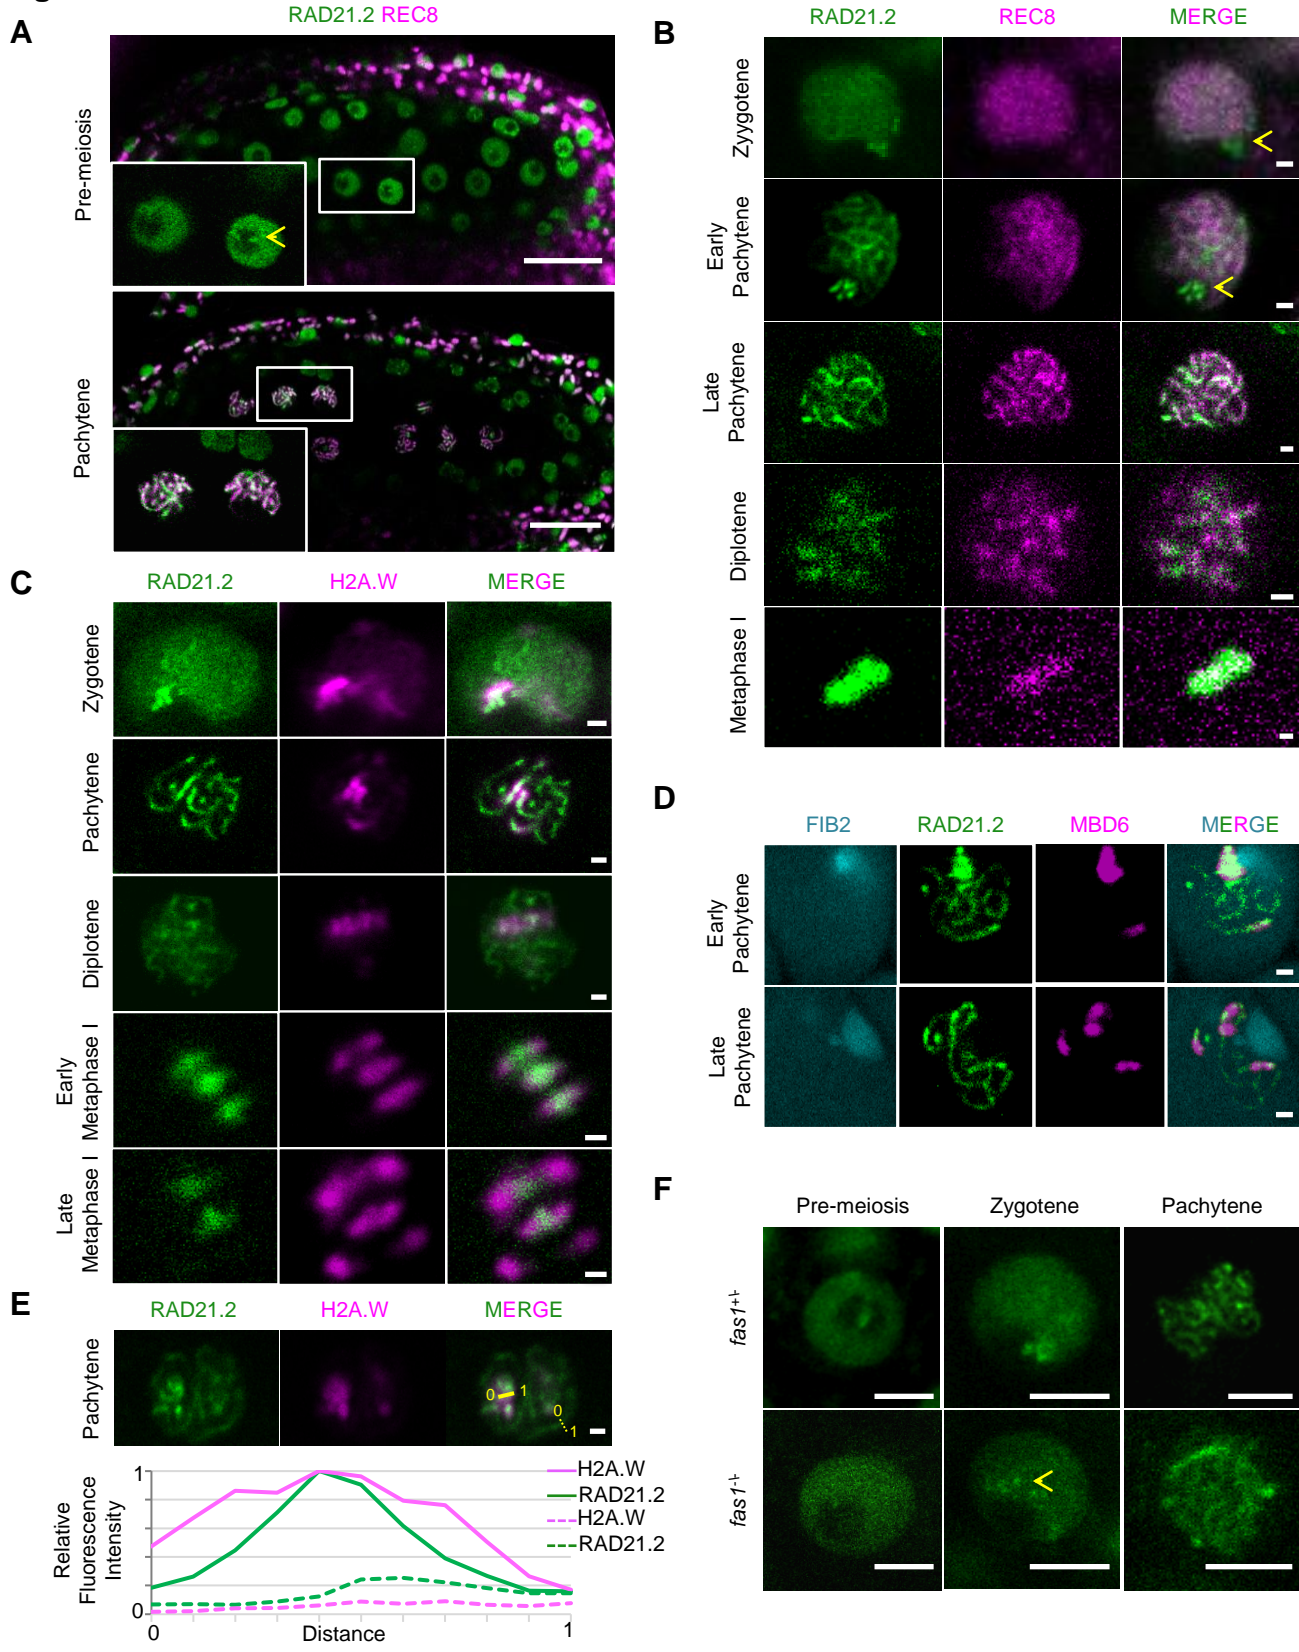

**Figure 2**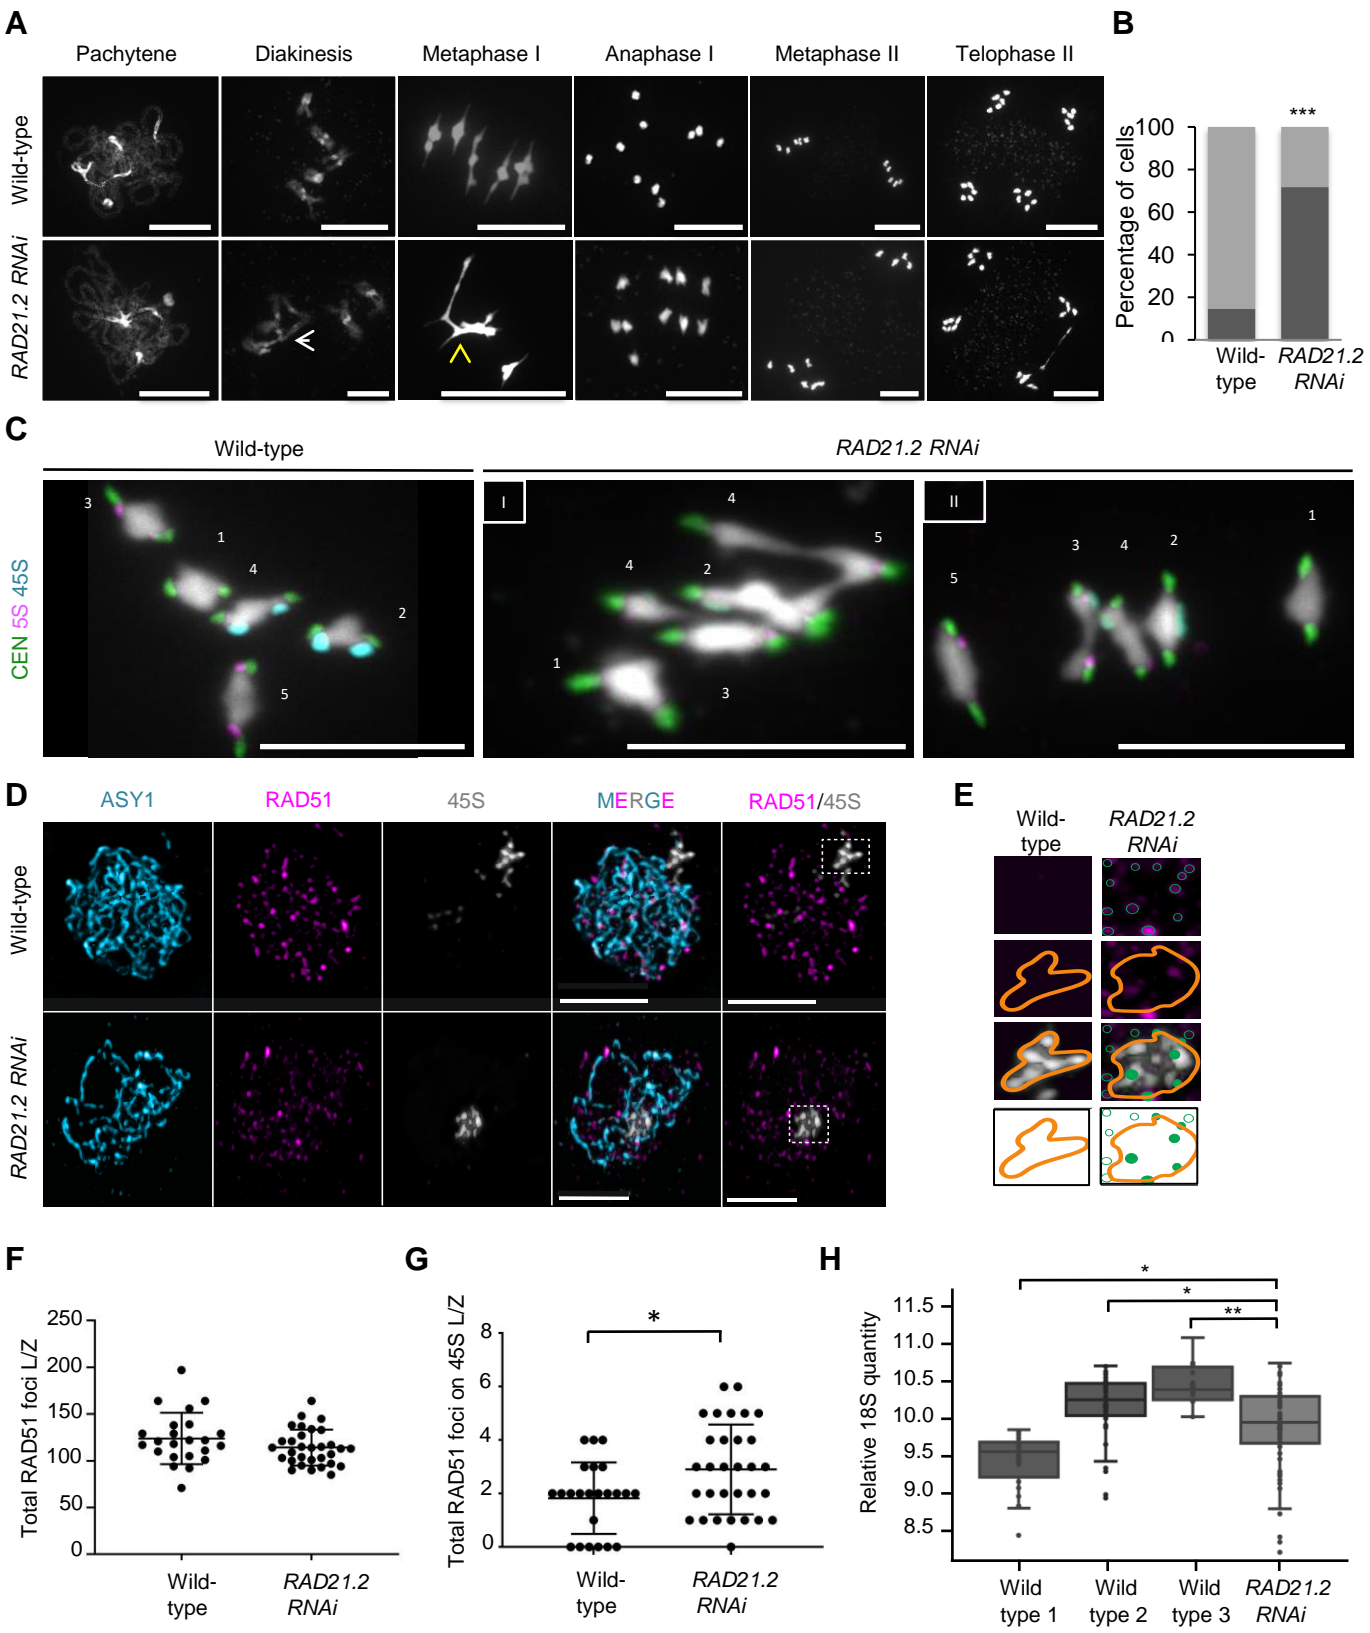

**Figure 3****A**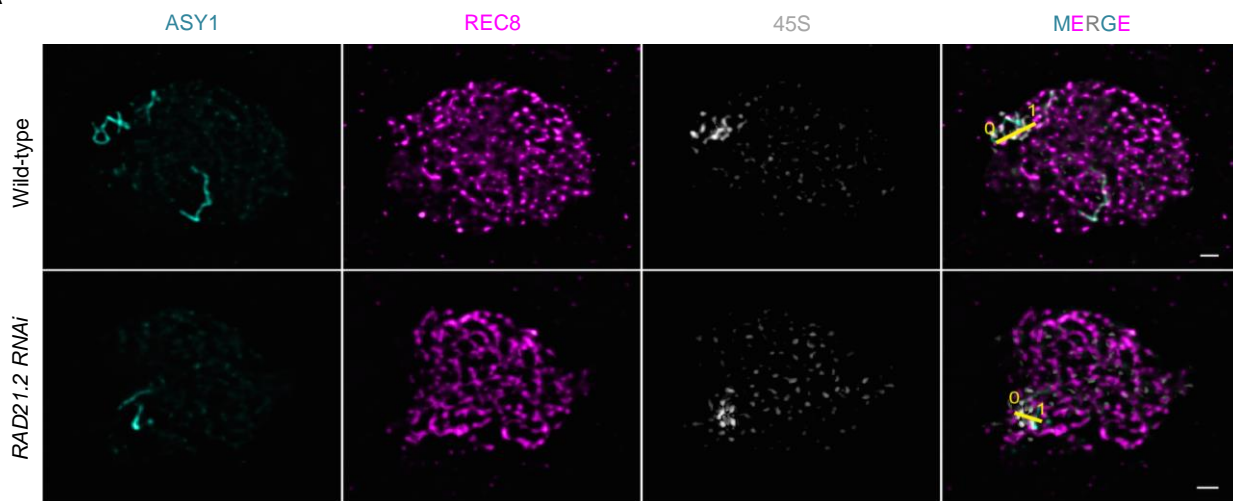**B**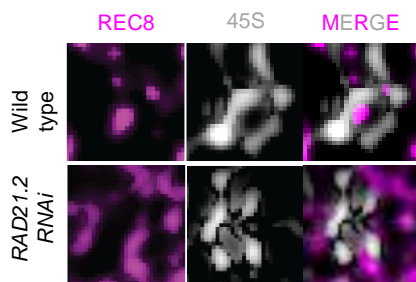**C**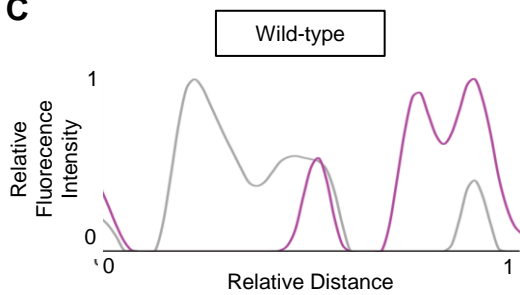**D**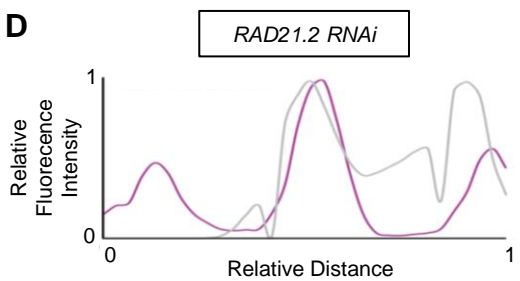**E**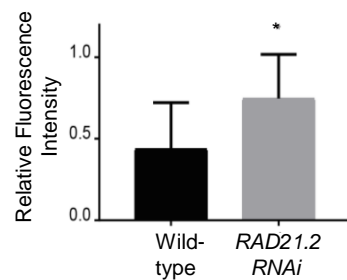

Source: https://www.biorxiv.org/content/10.1101/2022.06.20.496767v1.full.pdf
